# Supplementary material
Source: PubMed Central journal article supplement (PMC8733868)
Supplement: jamapsychiatry-e213815-s001.pdf [file jamapsychiatry-e213815-s001.pdf]

## Supplementary Online Content

Straub L, Bateman BT, Hernandez-Diaz S, et al. Neurodevelopmental disorders among publicly or privately insured children in the United States. *JAMA Psychiatry*. Published online January 5, 2022.

doi:10.1001/jamapsychiatry.2021.3815

**eTable 1.** Definition of Neurodevelopmental Disorders of Interest

**eTable 2.** Patient Characteristics Among Children With the Specific Neurodevelopmental Disorder of Interest vs Children Without Any Neurodevelopmental Disorders, After 1:4 Matching on State and Follow-up, Separately for Publicly and Privately Insured Children

**eTable 3.** Patient Characteristics Among Children, Stratified by Length of Continuous Enrollment, Separately for A) Publicly Insured Children and B) Privately Insured Children

**eFigure 1.** Cumulative Incidence Curves for Each of the Specific Neurodevelopmental Disorders of Interest, Stratified by Insurance Type, Child's Sex, Year of Birth, Maternal Age, and Race/Ethnicity

**eFigure 2.** Children's Mean Age in Years (95% Confidence Interval) at Diagnosis of Each of the Specific Neurodevelopmental Disorders of Interest, Separately for Publicly and Privately Insured Children, Stratified by A) Child's Sex, B) Maternal Age, and C) Race/Ethnicity (Public Insurance Only)

**eFigure 3.** Length of Continuous Enrollment Stratified by Birth Year, Among A) Publicly Insured and B) Privately Insured Children

**eAppendix 1.** Description and Patient Characteristics of the Publicly and Privately Insured Mother-Child Linked Cohorts

**eAppendix 2.** Calculation of Mean Age at Diagnosis and 95% Confidence Intervals Accounting for Loss to Follow up

This supplementary material has been provided by the authors to give readers additional information about their work.

**eTable 1.** Definition of Neurodevelopmental Disorders of Interest

| <b>Outcome</b>                                                                  | <b>Algorithm</b>                                                                                                                                                                                                                                                                                                                                                                                                                  |
|---------------------------------------------------------------------------------|-----------------------------------------------------------------------------------------------------------------------------------------------------------------------------------------------------------------------------------------------------------------------------------------------------------------------------------------------------------------------------------------------------------------------------------|
| Autism Spectrum Disorder                                                        | At ≥ 1 year of age:<br>≥ 2 dates with ICD-9 Dx 299.xx (except 299.1x)                                                                                                                                                                                                                                                                                                                                                             |
| Attention Deficit Hyperactivity Disorder/<br>Hyperkinetic Syndrome of Childhood | At ≥ 2 years of age, any of the following: <ul style="list-style-type: none"> <li>• ≥ 2 dates with ICD-9 Dx 314.xx</li> <li>• ≥ 2 dispensings of atomoxetine, clonidine, guanfacine, (dextro/lisdex)amphetamine, (dex)methylphenidate</li> <li>• ≥ 1 Dx 314.xx &amp; ≥ 1 dispensing</li> </ul>                                                                                                                                    |
| Learning Difficulty                                                             | At ≥ 2 years of age: ≥ 1 ICD-9 Dx 315.0x, 315.1, 315.2                                                                                                                                                                                                                                                                                                                                                                            |
| Developmental Speech or Language Disorder                                       | At ≥ 1.5 years of age: ≥ 2 dates with ICD-9 Dx 315.3x (except 315.34)                                                                                                                                                                                                                                                                                                                                                             |
| Intellectual disability                                                         | At ≥ 2 years of age: ≥ 2 dates with ICD-9 Dx 317, 318.x, 319                                                                                                                                                                                                                                                                                                                                                                      |
| Developmental Coordination Disorder                                             | ≥ 2 dates with ICD-9 Dx 315.4 (any age)                                                                                                                                                                                                                                                                                                                                                                                           |
| Behavioral Disorder                                                             | At ≥ 2 years of age: ≥ 2 dates with ICD-9 Dx 312.xx, 313.xx                                                                                                                                                                                                                                                                                                                                                                       |
| Any Specific Neurodevelopmental Disorder                                        | Presence of any of the outcomes above                                                                                                                                                                                                                                                                                                                                                                                             |
| Any Neurodevelopmental Disorder - Expanded Definition                           | Composite definition: <ul style="list-style-type: none"> <li>• Presence of any of the outcomes above OR</li> <li>• Developmental delay: ≥ 2 dates with ICD-9 Dx 315.xx (except 315.34), 317, 318.x, 319 (any age) OR</li> <li>• Behavioral/neurotic/personality disorders: At ≥ 2 years of age: ≥ 2 dates with ICD-9 Dx 312.xx, 313.xx, 300.xx, 293.83, 296.2x, 296.3x, 298.0x, 309.0x, 309.1x, 309.28, 311.xx, 301.xx</li> </ul> |

Abbreviations: Dx, diagnosis; ICD, International Classification of Disease.

**eTable 2.** Patient Characteristics<sup>a</sup> Among Children With the Specific Neurodevelopmental Disorder of Interest vs Children Without Any Neurodevelopmental Disorders, After 1:4 Matching on State and Follow-up, Separately for Publicly and Privately Insured Children

**A. Any Specific Neurodevelopmental Disorder**

| Name                            | Public Insurance   |                       |        | Private Insurance  |                       |                  |
|---------------------------------|--------------------|-----------------------|--------|--------------------|-----------------------|------------------|
|                                 | N (%) / Mean (SD)  |                       | Stdiff | N (%) / Mean (SD)  |                       | Stdiff           |
|                                 | Cases <sup>b</sup> | Controls <sup>c</sup> |        | Cases <sup>b</sup> | Controls <sup>c</sup> |                  |
| Total                           | 71,604             | 286,416               |        | 32,426             | 129,704               |                  |
| Follow-up Years, Mean (SD)      | 5.28 (2.13)        | 5.17 (2.14)           | 0.05   | 5.66 (2.68)        | 5.60 (2.71)           | 0.02             |
| Maternal Age (Years), Mean (SD) | 24.81 (5.91)       | 24.68 (6.01)          | 0.02   | 32.74 (4.68)       | 32.26 (4.58)          | 0.10             |
| Gender, N(%)                    |                    |                       |        |                    |                       |                  |
| Male                            | 47193 (65.91%)     | 137567 (48.03%)       | 0.37   | 22229 (68.55%)     | 64094 (49.42%)        | 0.40             |
| Female                          | 23409 (32.69%)     | 146556 (51.17%)       | -0.38  | 9395 (28.97%)      | 64461 (49.70%)        | -0.43            |
| Unknown                         | 1002 (1.40%)       | 2293 (0.80%)          | 0.06   | 802 (2.47%)        | 1149 (0.89%)          | 0.12             |
| Region, N (%)                   |                    |                       |        |                    |                       |                  |
| Northeast                       | 16899 (23.60%)     | 67596 (23.60%)        | 0.00   | 6075 (18.73%)      | 24300 (18.73%)        | 0.00             |
| Midwest                         | 19721 (27.54%)     | 78884 (27.54%)        | 0.00   | 8649 (26.67%)      | 34596 (26.67%)        | 0.00             |
| South                           | 18597 (25.97%)     | 74388 (25.97%)        | 0.00   | 12901 (39.79%)     | 51604 (39.79%)        | 0.00             |
| West                            | 16387 (22.89%)     | 65548 (22.89%)        | 0.00   | 4582 (14.13%)      | 18328 (14.13%)        | 0.00             |
| Year of Birth, N (%)            |                    |                       |        |                    |                       |                  |
| Before 2006                     | 16913 (23.62%)     | 84379 (29.46%)        | -0.13  | 4491 (13.85%)      | 20395 (15.72%)        | -0.05            |
| 2006-2009                       | 39143 (54.67%)     | 149064 (52.04%)       | 0.05   | 13670 (42.16%)     | 57992 (44.71%)        | -0.05            |
| After 2009                      | 15548 (21.71%)     | 52973 (18.50%)        | 0.08   | 14265 (43.99%)     | 51317 (39.56%)        | 0.09             |
| Race/Ethnicity, N (%)           |                    |                       |        |                    |                       |                  |
| White                           | 33071 (46.19%)     | 108112 (37.75%)       | 0.17   | N/A <sup>d</sup>   | N/A <sup>d</sup>      | N/A <sup>d</sup> |
| Black                           | 19963 (27.88%)     | 97518 (34.05%)        | -0.13  | N/A <sup>d</sup>   | N/A <sup>d</sup>      | N/A <sup>d</sup> |
| Hispanic/Latino                 | 9452 (13.20%)      | 40893 (14.28%)        | -0.03  | N/A <sup>d</sup>   | N/A <sup>d</sup>      | N/A <sup>d</sup> |
| Asian/Pacific Islander          | 2084 (2.91%)       | 13488 (4.71%)         | -0.09  | N/A <sup>d</sup>   | N/A <sup>d</sup>      | N/A <sup>d</sup> |
| Other/Unknown                   | 7034 (9.82%)       | 26405 (9.22%)         | 0.02   | N/A <sup>d</sup>   | N/A <sup>d</sup>      | N/A <sup>d</sup> |
| Maternal Conditions, N (%)      |                    |                       |        |                    |                       |                  |
| Pre-existing Hypertension       | 2286 (3.19%)       | 6519 (2.28%)          | 0.06   | 943 (2.91%)        | 2797 (2.16%)          | 0.05             |
| Pre-eclampsia                   | 4595 (6.42%)       | 14408 (5.03%)         | 0.06   | 2807 (8.66%)       | 7458 (5.75%)          | 0.11             |
| Pre-existing Diabetes           | 2642 (3.69%)       | 7238 (2.53%)          | 0.07   | 978 (3.02%)        | 2910 (2.24%)          | 0.05             |
| Gestational Diabetes            | 136 (0.19%)        | 422 (0.15%)           | 0.01   | 40 (0.12%)         | 169 (0.13%)           | 0.00             |
| Obstetric Conditions, N (%)     |                    |                       |        |                    |                       |                  |
| Low Birth Weight                | 5805 (8.11%)       | 12016 (4.20%)         | 0.16   | 2512 (7.75%)       | 3958 (3.05%)          | 0.21             |
| Small for Gestational Age       | 2943 (4.11%)       | 8406 (2.93%)          | 0.06   | 1372 (4.23%)       | 3345 (2.58%)          | 0.09             |
| Neonatal Hypoxia/Asphyxia       | 756 (1.06%)        | 2191 (0.76%)          | 0.03   | 291 (0.90%)        | 895 (0.69%)           | 0.02             |
| Preterm Birth (>28 & <37 GW)    | 10846 (15.15%)     | 27244 (9.51%)         | 0.17   | 4847 (14.95%)      | 10316 (7.95%)         | 0.22             |
| Very Preterm Birth (<=28 GW)    | 1296 (1.81%)       | 1444 (0.50%)          | 0.12   | 674 (2.08%)        | 632 (0.49%)           | 0.14             |
| Co-occurring NDDs               |                    |                       |        |                    |                       |                  |
| N Specific NDDs, Mean (SD)      | 1.29 (0.59)        | -                     | -      | 1.22 (0.53)        | -                     | -                |
| N Specific NDDs, N (%)          |                    |                       |        |                    |                       |                  |
| 1                               | 55160 (77.03%)     | -                     | -      | 26613 (82.07%)     | -                     | -                |

| Name                 | Public Insurance   |                       |        | Private Insurance  |                       |        |
|----------------------|--------------------|-----------------------|--------|--------------------|-----------------------|--------|
|                      | N (%) / Mean (SD)  |                       |        | N (%) / Mean (SD)  |                       |        |
|                      | Cases <sup>b</sup> | Controls <sup>c</sup> | Stdiff | Cases <sup>b</sup> | Controls <sup>c</sup> | Stdiff |
| 2                    | 12961 (18.10%)     | -                     | -      | 4582 (14.13%)      | -                     | -      |
| 3                    | 2858 (3.99%)       | -                     | -      | 1009 (3.11%)       | -                     | -      |
| 4                    | 528 (0.74%)        | -                     | -      | 196 (0.60%)        | -                     | -      |
| 5                    | 84 (0.12%)         | -                     | -      | 24 (0.07%)         | -                     | -      |
| 6                    | 11 (0.02%)         | -                     | -      | 2 (0.01%)          | -                     | -      |
| 7                    | <11                | -                     | -      | 0 (0.00%)          | -                     | -      |
| Specific NDDs, N (%) |                    |                       |        |                    |                       |        |
| ASD                  | 6548 (9.14%)       | -                     | -      | 3809 (11.75%)      | -                     | -      |
| ADHD                 | 19917 (27.82%)     | -                     | -      | 8112 (25.02%)      | -                     | -      |
| LD                   | 1992 (2.78%)       | -                     | -      | 898 (2.77%)        | -                     | -      |
| SLD                  | 37857 (52.87%)     | -                     | -      | 20252 (62.46%)     | -                     | -      |
| DCD                  | 6763 (9.45%)       | -                     | -      | 3618 (11.16%)      | -                     | -      |
| ID                   | 1495 (2.09%)       | -                     | -      | 90 (0.28%)         | -                     | -      |
| BD                   | 17696 (24.71%)     | -                     | -      | 2941 (9.07%)       | -                     | -      |

**B. Autism Spectrum Disorder**

|                                 | Public Insurance   |                       |        | Private Insurance  |                       |                  |
|---------------------------------|--------------------|-----------------------|--------|--------------------|-----------------------|------------------|
|                                 | N (%) / Mean (SD)  |                       |        | N (%) / Mean (SD)  |                       |                  |
| Name                            | Cases <sup>b</sup> | Controls <sup>c</sup> | Stdiff | Cases <sup>b</sup> | Controls <sup>c</sup> | Stdiff           |
| Total                           | 10,093             | 40,372                |        | 3,847              | 15,388                |                  |
| Follow-up Years, Mean (SD)      | 6.77 (2.82)        | 6.74 (2.85)           | 0.01   | 5.92 (2.44)        | 5.90 (2.46)           | 0.01             |
| Maternal Age (Years), Mean (SD) | 25.75 (6.20)       | 24.68 (6.04)          | 0.17   | 33.12 (4.78)       | 32.40 (4.60)          | 0.15             |
| Gender, N(%)                    |                    |                       |        |                    |                       |                  |
| Male                            | 7703 (76.32%)      | 18869 (46.74%)        | 0.64   | 3002 (78.03%)      | 7534 (48.96%)         | 0.63             |
| Female                          | 2207 (21.87%)      | 21181 (52.46%)        | -0.67  | 726 (18.87%)       | 7695 (50.01%)         | -0.69            |
| Unknown                         | 183 (1.81%)        | 322 (0.80%)           | 0.09   | 119 (3.09%)        | 159 (1.03%)           | 0.15             |
| Region, N (%)                   |                    |                       |        |                    |                       |                  |
| Northeast                       | 2586 (25.62%)      | 10344 (25.62%)        | 0.00   | 973 (25.29%)       | 3892 (25.29%)         | 0.00             |
| Midwest                         | 2997 (29.69%)      | 11988 (29.69%)        | 0.00   | 825 (21.45%)       | 3300 (21.45%)         | 0.00             |
| South                           | 2689 (26.64%)      | 10756 (26.64%)        | 0.00   | 1398 (36.34%)      | 5592 (36.34%)         | 0.00             |
| West                            | 1821 (18.04%)      | 7284 (18.04%)         | 0.00   | 620 (16.12%)       | 2480 (16.12%)         | 0.00             |
| Year of Birth, N (%)            |                    |                       |        |                    |                       |                  |
| Before 2006                     | 3928 (38.92%)      | 18752 (46.45%)        | -0.15  | 525 (13.65%)       | 2408 (15.65%)         | -0.06            |
| 2006-2009                       | 4353 (43.13%)      | 15923 (39.44%)        | 0.07   | 1731 (45.00%)      | 7227 (46.97%)         | -0.04            |
| After 2009                      | 1812 (17.95%)      | 5697 (14.11%)         | 0.10   | 1591 (41.36%)      | 5753 (37.39%)         | 0.08             |
| Race/Ethnicity, N (%)           |                    |                       |        |                    |                       |                  |
| White                           | 4848 (48.03%)      | 15402 (38.15%)        | 0.20   | N/A <sup>d</sup>   | N/A <sup>d</sup>      | N/A <sup>d</sup> |
| Black                           | 2660 (26.35%)      | 15036 (37.24%)        | -0.24  | N/A <sup>d</sup>   | N/A <sup>d</sup>      | N/A <sup>d</sup> |
| Hispanic/Latino                 | 1106 (10.96%)      | 4748 (11.76%)         | -0.03  | N/A <sup>d</sup>   | N/A <sup>d</sup>      | N/A <sup>d</sup> |
| Asian/Pacific Islander          | 322 (3.19%)        | 1688 (4.18%)          | -0.05  | N/A <sup>d</sup>   | N/A <sup>d</sup>      | N/A <sup>d</sup> |
| Other/Unknown                   | 1157 (11.46%)      | 3498 (8.66%)          | 0.09   | N/A <sup>d</sup>   | N/A <sup>d</sup>      | N/A <sup>d</sup> |
| Maternal Conditions, N (%)      |                    |                       |        |                    |                       |                  |
| Pre-existing Hypertension       | 385 (3.81%)        | 933 (2.31%)           | 0.09   | 121 (3.15%)        | 332 (2.16%)           | 0.06             |
| Pre-eclampsia                   | 653 (6.47%)        | 2008 (4.97%)          | 0.06   | 361 (9.38%)        | 886 (5.76%)           | 0.14             |
| Pre-existing Diabetes           | 444 (4.40%)        | 988 (2.45%)           | 0.11   | 141 (3.67%)        | 340 (2.21%)           | 0.09             |
| Gestational Diabetes            | 20 (0.20%)         | 57 (0.14%)            | 0.01   | 4 (0.10%)          | 14 (0.09%)            | 0.00             |
| Obstetric Conditions, N (%)     |                    |                       |        |                    |                       |                  |
| Low Birth Weight                | 762 (7.55%)        | 1724 (4.27%)          | 0.14   | 287 (7.46%)        | 451 (2.93%)           | 0.21             |
| Small for Gestational Age       | 364 (3.61%)        | 1134 (2.81%)          | 0.05   | 149 (3.87%)        | 374 (2.43%)           | 0.08             |
| Neonatal Hypoxia/Asphyxia       | 108 (1.07%)        | 358 (0.89%)           | 0.02   | 38 (0.99%)         | 102 (0.66%)           | 0.04             |
| Preterm Birth (>28 & <37 GW)    | 1521 (15.07%)      | 3788 (9.38%)          | 0.17   | 577 (15.00%)       | 1239 (8.05%)          | 0.22             |
| Very Preterm Birth (<=28 GW)    | 146 (1.45%)        | 210 (0.52%)           | 0.09   | 77 (2.00%)         | 67 (0.44%)            | 0.14             |
| Co-occurring NDDs               |                    |                       |        |                    |                       |                  |
| N Specific NDDs, Mean (SD)      | 2.34 (1.10)        | -                     | -      | 1.99 (0.84)        | -                     | -                |
| N Specific NDDs, N (%)          |                    |                       |        |                    |                       |                  |
| 1                               | 2589 (25.65%)      | -                     | -      | 1125 (29.24%)      | -                     | -                |
| 2                               | 3399 (33.68%)      | -                     | -      | 1850 (48.09%)      | -                     | -                |
| 3                               | 2626 (26.02%)      | -                     | -      | 677 (17.60%)       | -                     | -                |

| Name                 | Public Insurance   |                       |        | Private Insurance  |                       |        |
|----------------------|--------------------|-----------------------|--------|--------------------|-----------------------|--------|
|                      | N (%) / Mean (SD)  |                       |        | N (%) / Mean (SD)  |                       |        |
|                      | Cases <sup>b</sup> | Controls <sup>c</sup> | Stdiff | Cases <sup>b</sup> | Controls <sup>c</sup> | Stdiff |
| 4                    | 1105 (10.95%)      | -                     | -      | 168 (4.37%)        | -                     | -      |
| 5                    | 321 (3.18%)        | -                     | -      | 25 (0.65%)         | -                     | -      |
| 6                    | 50 (0.50%)         | -                     | -      | 2 (0.05%)          | -                     | -      |
| 7                    | <11                | -                     | -      | 0 (0.00%)          | -                     | -      |
| Specific NDDs, N (%) |                    |                       |        |                    |                       |        |
| ASD                  | 10093 (100.00%)    | -                     | -      | 3847 (100.00%)     | -                     | -      |
| ADHD                 | 3771 (37.36%)      | -                     | -      | 858 (22.30%)       | -                     | -      |
| LD                   | 468 (4.64%)        | -                     | -      | 80 (2.08%)         | -                     | -      |
| SLD                  | 4773 (47.29%)      | -                     | -      | 2150 (55.89%)      | -                     | -      |
| DCD                  | 1129 (11.19%)      | -                     | -      | 358 (9.31%)        | -                     | -      |
| ID                   | 807 (8.00%)        | -                     | -      | 36 (0.94%)         | -                     | -      |
| BD                   | 2570 (25.46%)      | -                     | -      | 336 (8.73%)        | -                     | -      |

**C. Attention Deficit Hyperactivity Disorder/Hyperkinetic Syndrome of Childhood**

| Name                            | Public Insurance   |                       |        | Private Insurance  |                       |                  |
|---------------------------------|--------------------|-----------------------|--------|--------------------|-----------------------|------------------|
|                                 | N (%) / Mean (SD)  |                       | Stdiff | N (%) / Mean (SD)  |                       | Stdiff           |
|                                 | Cases <sup>b</sup> | Controls <sup>c</sup> |        | Cases <sup>b</sup> | Controls <sup>c</sup> |                  |
| Total                           | 33,259             | 133,036               |        | 8,260              | 33,040                |                  |
| Follow-up Years, Mean (SD)      | 7.33 (1.97)        | 7.23 (1.98)           | 0.05   | 8.46 (1.91)        | 8.43 (1.92)           | 0.02             |
| Maternal Age (Years), Mean (SD) | 23.87 (5.53)       | 24.57 (5.97)          | -0.12  | 32.14 (4.75)       | 32.21 (4.54)          | -0.01            |
| Gender, N(%)                    |                    |                       |        |                    |                       |                  |
| Male                            | 23171 (69.67%)     | 61979 (46.59%)        | 0.48   | 5942 (71.94%)      | 16045 (48.56%)        | 0.49             |
| Female                          | 9678 (29.10%)      | 70045 (52.65%)        | -0.49  | 2168 (26.25%)      | 16710 (50.58%)        | -0.52            |
| Unknown                         | 410 (1.23%)        | 1012 (0.76%)          | 0.05   | 150 (1.82%)        | 285 (0.86%)           | 0.08             |
| Region, N (%)                   |                    |                       |        |                    |                       |                  |
| Northeast                       | 6010 (18.07%)      | 24040 (18.07%)        | 0.00   | 934 (11.31%)       | 3736 (11.31%)         | 0.00             |
| Midwest                         | 9852 (29.62%)      | 39408 (29.62%)        | 0.00   | 2140 (25.91%)      | 8560 (25.91%)         | 0.00             |
| South                           | 11066 (33.27%)     | 44264 (33.27%)        | 0.00   | 4440 (53.75%)      | 17760 (53.75%)        | 0.00             |
| West                            | 6331 (19.04%)      | 25324 (19.04%)        | 0.00   | 699 (8.46%)        | 2796 (8.46%)          | 0.00             |
| Year of Birth, N (%)            |                    |                       |        |                    |                       |                  |
| Before 2006                     | 14640 (44.02%)     | 61943 (46.56%)        | -0.05  | 2692 (32.59%)      | 10629 (32.17%)        | 0.01             |
| 2006-2009                       | 17675 (53.14%)     | 67192 (50.51%)        | 0.05   | 5019 (60.76%)      | 20101 (60.84%)        | 0.00             |
| After 2009                      | 944 (2.84%)        | 3901 (2.93%)          | -0.01  | 549 (6.65%)        | 2310 (6.99%)          | -0.01            |
| Race/Ethnicity, N (%)           |                    |                       |        |                    |                       |                  |
| White                           | 17283 (51.96%)     | 49933 (37.53%)        | 0.29   | N/A <sup>d</sup>   | N/A <sup>d</sup>      | N/A <sup>d</sup> |
| Black                           | 10263 (30.86%)     | 52515 (39.47%)        | -0.18  | N/A <sup>d</sup>   | N/A <sup>d</sup>      | N/A <sup>d</sup> |
| Hispanic/Latino                 | 3295 (9.91%)       | 16655 (12.52%)        | -0.08  | N/A <sup>d</sup>   | N/A <sup>d</sup>      | N/A <sup>d</sup> |
| Asian/Pacific Islander          | 398 (1.20%)        | 5254 (3.95%)          | -0.17  | N/A <sup>d</sup>   | N/A <sup>d</sup>      | N/A <sup>d</sup> |
| Other/Unknown                   | 2020 (6.07%)       | 8679 (6.52%)          | -0.02  | N/A <sup>d</sup>   | N/A <sup>d</sup>      | N/A <sup>d</sup> |
| Maternal Conditions, N (%)      |                    |                       |        |                    |                       |                  |
| Pre-existing Hypertension       | 1012 (3.04%)       | 3077 (2.31%)          | 0.05   | 225 (2.72%)        | 703 (2.13%)           | 0.04             |
| Pre-eclampsia                   | 2037 (6.12%)       | 6601 (4.96%)          | 0.05   | 694 (8.40%)        | 1835 (5.55%)          | 0.11             |
| Pre-existing Diabetes           | 1078 (3.24%)       | 3121 (2.35%)          | 0.05   | 270 (3.27%)        | 713 (2.16%)           | 0.07             |
| Gestational Diabetes            | 53 (0.16%)         | 202 (0.15%)           | 0.00   | 5 (0.06%)          | 45 (0.14%)            | -0.02            |
| Obstetric Conditions, N (%)     |                    |                       |        |                    |                       |                  |
| Low Birth Weight                | 2107 (6.34%)       | 5765 (4.33%)          | 0.09   | 457 (5.53%)        | 980 (2.97%)           | 0.13             |
| Small for Gestational Age       | 1104 (3.32%)       | 3626 (2.73%)          | 0.03   | 222 (2.69%)        | 626 (1.89%)           | 0.05             |
| Neonatal Hypoxia/Asphyxia       | 337 (1.01%)        | 1187 (0.89%)          | 0.01   | 58 (0.70%)         | 238 (0.72%)           | 0.00             |
| Preterm Birth (>28 & <37 GW)    | 4306 (12.95%)      | 12809 (9.63%)         | 0.11   | 1009 (12.22%)      | 2575 (7.79%)          | 0.15             |
| Very Preterm Birth (<=28 GW)    | 318 (0.96%)        | 670 (0.50%)           | 0.05   | 96 (1.16%)         | 188 (0.57%)           | 0.06             |
| Co-occurring NDDs               |                    |                       |        |                    |                       |                  |
| N Specific NDDs, Mean (SD)      | 1.67 (0.81)        | -                     | -      | 1.47 (0.77)        | -                     | -                |
| N Specific NDDs, N (%)          |                    |                       |        |                    |                       |                  |
| 1                               | 16586 (49.87%)     | -                     | -      | 5463 (66.14%)      | -                     | -                |
| 2                               | 12193 (36.66%)     | -                     | -      | 1917 (23.21%)      | -                     | -                |
| 3                               | 3430 (10.31%)      | -                     | -      | 670 (8.11%)        | -                     | -                |

| Name                 | Public Insurance   |                       |        | Private Insurance  |                       |        |
|----------------------|--------------------|-----------------------|--------|--------------------|-----------------------|--------|
|                      | N (%) / Mean (SD)  |                       |        | N (%) / Mean (SD)  |                       |        |
|                      | Cases <sup>b</sup> | Controls <sup>c</sup> | Stdiff | Cases <sup>b</sup> | Controls <sup>c</sup> | Stdiff |
| 4                    | 869 (2.61%)        | -                     | -      | 183 (2.22%)        | -                     | -      |
| 5                    | 160 (0.48%)        | -                     | -      | 25 (0.30%)         | -                     | -      |
| 6                    | 19 (0.06%)         | -                     | -      | 2 (0.02%)          | -                     | -      |
| 7                    | <11                | -                     | -      | 0 (0.00%)          | -                     | -      |
| Specific NDDs, N (%) |                    |                       |        |                    |                       |        |
| ASD                  | 2302 (6.92%)       | -                     | -      | 854 (10.34%)       | -                     | -      |
| ADHD                 | 33259 (100.00%)    | -                     | -      | 8260 (100.00%)     | -                     | -      |
| LD                   | 1208 (3.63%)       | -                     | -      | 373 (4.52%)        | -                     | -      |
| SLD                  | 6149 (18.49%)      | -                     | -      | 1148 (13.90%)      | -                     | -      |
| DCD                  | 715 (2.15%)        | -                     | -      | 278 (3.37%)        | -                     | -      |
| ID                   | 536 (1.61%)        | -                     | -      | 41 (0.50%)         | -                     | -      |
| BD                   | 11497 (34.57%)     | -                     | -      | 1222 (14.79%)      | -                     | -      |



**D. Learning Disability**

|                                 | Public Insurance   |                       |        | Private Insurance  |                       |                  |
|---------------------------------|--------------------|-----------------------|--------|--------------------|-----------------------|------------------|
|                                 | N (%) / Mean (SD)  |                       |        | N (%) / Mean (SD)  |                       |                  |
| Name                            | Cases <sup>b</sup> | Controls <sup>c</sup> | Stdiff | Cases <sup>b</sup> | Controls <sup>c</sup> | Stdiff           |
| Total                           | 5,477              | 21,908                |        | 929                | 3,716                 |                  |
| Follow-up Years, Mean (SD)      | 8.63 (2.41)        | 8.60 (2.42)           | 0.01   | 8.23 (2.22)        | 8.23 (2.22)           | 0.00             |
| Maternal Age (Years), Mean (SD) | 24.63 (5.85)       | 24.75 (6.06)          | -0.02  | 32.71 (4.91)       | 32.54 (4.56)          | 0.04             |
| Gender, N(%)                    |                    |                       |        |                    |                       |                  |
| Male                            | 3323 (60.67%)      | 9819 (44.82%)         | 0.32   | 575 (61.89%)       | 1813 (48.79%)         | 0.27             |
| Female                          | 2071 (37.81%)      | 11938 (54.49%)        | -0.34  | 331 (35.63%)       | 1879 (50.57%)         | -0.30            |
| Unknown                         | 83 (1.52%)         | 151 (0.69%)           | 0.08   | 23 (2.48%)         | 24 (0.65%)            | 0.15             |
| Region, N (%)                   |                    |                       |        |                    |                       |                  |
| Northeast                       | 1497 (27.33%)      | 5988 (27.33%)         | 0.00   | 236 (25.40%)       | 944 (25.40%)          | 0.00             |
| Midwest                         | 1582 (28.88%)      | 6328 (28.88%)         | 0.00   | 172 (18.51%)       | 688 (18.51%)          | 0.00             |
| South                           | 1550 (28.30%)      | 6200 (28.30%)         | 0.00   | 387 (41.66%)       | 1548 (41.66%)         | 0.00             |
| West                            | 848 (15.48%)       | 3392 (15.48%)         | 0.00   | 127 (13.67%)       | 508 (13.67%)          | 0.00             |
| Year of Birth, N (%)            |                    |                       |        |                    |                       |                  |
| Before 2006                     | 3704 (67.63%)      | 15319 (69.92%)        | -0.05  | 310 (33.37%)       | 1210 (32.56%)         | 0.02             |
| 2006-2009                       | 1603 (29.27%)      | 6022 (27.49%)         | 0.04   | 530 (57.05%)       | 2119 (57.02%)         | 0.00             |
| After 2009                      | 170 (3.10%)        | 567 (2.59%)           | 0.03   | 89 (9.58%)         | 387 (10.41%)          | -0.03            |
| Race/Ethnicity, N (%)           |                    |                       |        |                    |                       |                  |
| White                           | 2474 (45.17%)      | 8318 (37.97%)         | 0.15   | N/A <sup>d</sup>   | N/A <sup>d</sup>      | N/A <sup>d</sup> |
| Black                           | 1809 (33.03%)      | 8568 (39.11%)         | -0.13  | N/A <sup>d</sup>   | N/A <sup>d</sup>      | N/A <sup>d</sup> |
| Hispanic/Latino                 | 717 (13.09%)       | 2769 (12.64%)         | 0.01   | N/A <sup>d</sup>   | N/A <sup>d</sup>      | N/A <sup>d</sup> |
| Asian/Pacific Islander          | 97 (1.77%)         | 783 (3.57%)           | -0.11  | N/A <sup>d</sup>   | N/A <sup>d</sup>      | N/A <sup>d</sup> |
| Other/Unknown                   | 380 (6.94%)        | 1470 (6.71%)          | 0.01   | N/A <sup>d</sup>   | N/A <sup>d</sup>      | N/A <sup>d</sup> |
| Maternal Conditions, N (%)      |                    |                       |        |                    |                       |                  |
| Pre-existing Hypertension       | 140 (2.56%)        | 436 (1.99%)           | 0.04   | 25 (2.69%)         | 91 (2.45%)            | 0.02             |
| Pre-eclampsia                   | 332 (6.06%)        | 1027 (4.69%)          | 0.06   | 75 (8.07%)         | 199 (5.36%)           | 0.11             |
| Pre-existing Diabetes           | 194 (3.54%)        | 487 (2.22%)           | 0.08   | 29 (3.12%)         | 85 (2.29%)            | 0.05             |
| Gestational Diabetes            | <11                | 26 (0.12%)            | 0.00   | 1 (0.11%)          | 1 (0.03%)             | 0.03             |
| Obstetric Conditions, N (%)     |                    |                       |        |                    |                       |                  |
| Low Birth Weight                | 443 (8.09%)        | 872 (3.98%)           | 0.17   | 72 (7.75%)         | 122 (3.28%)           | 0.20             |
| Small for Gestational Age       | 202 (3.69%)        | 580 (2.65%)           | 0.06   | 25 (2.69%)         | 76 (2.05%)            | 0.04             |
| Neonatal Hypoxia/Asphyxia       | 90 (1.64%)         | 227 (1.04%)           | 0.05   | 12 (1.29%)         | 29 (0.78%)            | 0.05             |
| Preterm Birth (>28 & <37 GW)    | 821 (14.99%)       | 1944 (8.87%)          | 0.19   | 141 (15.18%)       | 302 (8.13%)           | 0.22             |
| Very Preterm Birth (<=28 GW)    | 111 (2.03%)        | 111 (0.51%)           | 0.14   | 14 (1.51%)         | 22 (0.59%)            | 0.09             |
| Co-occurring NDDs               |                    |                       |        |                    |                       |                  |
| N Specific NDDs, Mean (SD)      | 2.18 (1.09)        | -                     | -      | 1.89 (0.91)        | -                     | -                |
| N Specific NDDs, N (%)          |                    |                       |        |                    |                       |                  |
| 1                               | 1746 (31.88%)      | -                     | -      | 364 (39.18%)       | -                     | -                |
| 2                               | 1883 (34.38%)      | -                     | -      | 364 (39.18%)       | -                     | -                |
| 3                               | 1193 (21.78%)      | -                     | -      | 149 (16.04%)       | -                     | -                |

| Name                 | Public Insurance   |                       |        | Private Insurance  |                       |        |
|----------------------|--------------------|-----------------------|--------|--------------------|-----------------------|--------|
|                      | N (%) / Mean (SD)  |                       |        | N (%) / Mean (SD)  |                       |        |
|                      | Cases <sup>b</sup> | Controls <sup>c</sup> | Stdiff | Cases <sup>b</sup> | Controls <sup>c</sup> | Stdiff |
| 4                    | 477 (8.71%)        | -                     | -      | 42 (4.52%)         | -                     | -      |
| 5                    | 142 (2.59%)        | -                     | -      | 9 (0.97%)          | -                     | -      |
| 6                    | 33 (0.60%)         | -                     | -      | 1 (0.11%)          | -                     | -      |
| 7                    | <11                | -                     | -      | 0 (0.00%)          | -                     | -      |
| Specific NDDs, N (%) |                    |                       |        |                    |                       |        |
| ASD                  | 457 (8.34%)        | -                     | -      | 80 (8.61%)         | -                     | -      |
| ADHD                 | 2350 (42.91%)      | -                     | -      | 375 (40.37%)       | -                     | -      |
| LD                   | 5477 (100.00%)     | -                     | -      | 929 (100.00%)      | -                     | -      |
| SLD                  | 1918 (35.02%)      | -                     | -      | 240 (25.83%)       | -                     | -      |
| DCD                  | 249 (4.55%)        | -                     | -      | 52 (5.60%)         | -                     | -      |
| ID                   | 232 (4.24%)        | -                     | -      | 4 (0.43%)          | -                     | -      |
| BD                   | 1245 (22.73%)      | -                     | -      | 78 (8.40%)         | -                     | -      |

**E. Developmental Speech/Language Disorder**

|                                 | Public Insurance   |                       |        | Private Insurance  |                       |                  |
|---------------------------------|--------------------|-----------------------|--------|--------------------|-----------------------|------------------|
|                                 | N (%) / Mean (SD)  |                       |        | N (%) / Mean (SD)  |                       |                  |
| Name                            | Cases <sup>b</sup> | Controls <sup>c</sup> | Stdiff | Cases <sup>b</sup> | Controls <sup>c</sup> | Stdiff           |
| Total                           | 53,741             | 214,964               |        | 20,353             | 81,412                |                  |
| Follow-up Years, Mean (SD)      | 5.91 (2.58)        | 5.84 (2.61)           | 0.03   | 4.84 (2.19)        | 4.80 (2.22)           | 0.02             |
| Maternal Age (Years), Mean (SD) | 24.82 (5.85)       | 24.33 (5.86)          | 0.08   | 32.93 (4.62)       | 32.28 (4.59)          | 0.14             |
| Gender, N(%)                    |                    |                       |        |                    |                       |                  |
| Male                            | 35722 (66.47%)     | 101647 (47.29%)       | 0.39   | 14181 (69.68%)     | 40490 (49.73%)        | 0.42             |
| Female                          | 17203 (32.01%)     | 111642 (51.94%)       | -0.41  | 5633 (27.68%)      | 40194 (49.37%)        | -0.46            |
| Unknown                         | 816 (1.52%)        | 1675 (0.78%)          | 0.07   | 539 (2.65%)        | 728 (0.89%)           | 0.13             |
| Region, N (%)                   |                    |                       |        |                    |                       |                  |
| Northeast                       | 11464 (21.33%)     | 45856 (21.33%)        | 0.00   | 4005 (19.68%)      | 16020 (19.68%)        | 0.00             |
| Midwest                         | 18624 (34.66%)     | 74496 (34.66%)        | 0.00   | 5510 (27.07%)      | 22040 (27.07%)        | 0.00             |
| South                           | 17453 (32.48%)     | 69812 (32.48%)        | 0.00   | 7420 (36.46%)      | 29680 (36.46%)        | 0.00             |
| West                            | 6200 (11.54%)      | 24800 (11.54%)        | 0.00   | 3260 (16.02%)      | 13040 (16.02%)        | 0.00             |
| Year of Birth, N (%)            |                    |                       |        |                    |                       |                  |
| Before 2006                     | 18881 (35.13%)     | 88597 (41.21%)        | -0.13  | 1566 (7.69%)       | 8797 (10.81%)         | -0.11            |
| 2006-2009                       | 24454 (45.50%)     | 92095 (42.84%)        | 0.05   | 7380 (36.26%)      | 32692 (40.16%)        | -0.08            |
| After 2009                      | 10406 (19.36%)     | 34272 (15.94%)        | 0.09   | 11407 (56.05%)     | 39923 (49.04%)        | 0.14             |
| Race/Ethnicity, N (%)           |                    |                       |        |                    |                       |                  |
| White                           | 25841 (48.08%)     | 83734 (38.95%)        | 0.18   | N/A <sup>d</sup>   | N/A <sup>d</sup>      | N/A <sup>d</sup> |
| Black                           | 16629 (30.94%)     | 85823 (39.92%)        | -0.19  | N/A <sup>d</sup>   | N/A <sup>d</sup>      | N/A <sup>d</sup> |
| Hispanic/Latino                 | 4999 (9.30%)       | 20186 (9.39%)         | 0.00   | N/A <sup>d</sup>   | N/A <sup>d</sup>      | N/A <sup>d</sup> |
| Asian/Pacific Islander          | 1204 (2.24%)       | 6905 (3.21%)          | -0.06  | N/A <sup>d</sup>   | N/A <sup>d</sup>      | N/A <sup>d</sup> |
| Other/Unknown                   | 5068 (9.43%)       | 18316 (8.52%)         | 0.03   | N/A <sup>d</sup>   | N/A <sup>d</sup>      | N/A <sup>d</sup> |
| Maternal Conditions, N (%)      |                    |                       |        |                    |                       |                  |
| Pre-existing Hypertension       | 1764 (3.28%)       | 4935 (2.30%)          | 0.06   | 592 (2.91%)        | 1789 (2.20%)          | 0.05             |
| Pre-eclampsia                   | 3614 (6.72%)       | 11229 (5.22%)         | 0.06   | 1728 (8.49%)       | 4754 (5.84%)          | 0.10             |
| Pre-existing Diabetes           | 2046 (3.81%)       | 5090 (2.37%)          | 0.08   | 584 (2.87%)        | 1867 (2.29%)          | 0.04             |
| Gestational Diabetes            | 110 (0.20%)        | 268 (0.12%)           | 0.02   | 30 (0.15%)         | 107 (0.13%)           | 0.00             |
| Obstetric Conditions, N (%)     |                    |                       |        |                    |                       |                  |
| Low Birth Weight                | 4720 (8.78%)       | 9571 (4.45%)          | 0.17   | 1604 (7.88%)       | 2586 (3.18%)          | 0.21             |
| Small for Gestational Age       | 2331 (4.34%)       | 6562 (3.05%)          | 0.07   | 913 (4.49%)        | 2265 (2.78%)          | 0.09             |
| Neonatal Hypoxia/Asphyxia       | 631 (1.17%)        | 1916 (0.89%)          | 0.03   | 189 (0.93%)        | 525 (0.64%)           | 0.03             |
| Preterm Birth (>28 & <37 GW)    | 8557 (15.92%)      | 21350 (9.93%)         | 0.18   | 3094 (15.20%)      | 6535 (8.03%)          | 0.23             |
| Very Preterm Birth (<=28 GW)    | 1031 (1.92%)       | 1026 (0.48%)          | 0.13   | 460 (2.26%)        | 373 (0.46%)           | 0.16             |
| Co-occurring NDDs               |                    |                       |        |                    |                       |                  |
| N Specific NDDs, Mean (SD)      | 1.48 (0.81)        | -                     | -      | 1.26 (0.59)        | -                     | -                |
| N Specific NDDs, N (%)          |                    |                       |        |                    |                       |                  |
| 1                               | 36672 (68.24%)     | -                     | -      | 16312 (80.15%)     | -                     | -                |
| 2                               | 10516 (19.57%)     | -                     | -      | 2986 (14.67%)      | -                     | -                |
| 3                               | 4928 (9.17%)       | -                     | -      | 838 (4.12%)        | -                     | -                |

| Name                 | Public Insurance   |                       |        | Private Insurance  |                       |        |
|----------------------|--------------------|-----------------------|--------|--------------------|-----------------------|--------|
|                      | N (%) / Mean (SD)  |                       |        | N (%) / Mean (SD)  |                       |        |
|                      | Cases <sup>b</sup> | Controls <sup>c</sup> | Stdiff | Cases <sup>b</sup> | Controls <sup>c</sup> | Stdiff |
| 4                    | 1317 (2.45%)       | -                     | -      | 189 (0.93%)        | -                     | -      |
| 5                    | 270 (0.50%)        | -                     | -      | 26 (0.13%)         | -                     | -      |
| 6                    | 36 (0.07%)         | -                     | -      | 2 (0.01%)          | -                     | -      |
| 7                    | <11                | -                     | -      | 0 (0.00%)          | -                     | -      |
| Specific NDDs, N (%) |                    |                       |        |                    |                       |        |
| ASD                  | 4438 (8.26%)       | -                     | -      | 2149 (10.56%)      | -                     | -      |
| ADHD                 | 8887 (16.54%)      | -                     | -      | 1151 (5.66%)       | -                     | -      |
| LD                   | 1528 (2.84%)       | -                     | -      | 239 (1.17%)        | -                     | -      |
| SLD                  | 53741 (100.00%)    | -                     | -      | 20353 (100.00%)    | -                     | -      |
| DCD                  | 3444 (6.41%)       | -                     | -      | 1147 (5.64%)       | -                     | -      |
| ID                   | 1174 (2.18%)       | -                     | -      | 49 (0.24%)         | -                     | -      |
| BD                   | 6124 (11.40%)      | -                     | -      | 608 (2.99%)        | -                     | -      |

**F. Developmental Coordination Disorder**

|                                 | Public Insurance   |                       |        | Private Insurance  |                       |                  |
|---------------------------------|--------------------|-----------------------|--------|--------------------|-----------------------|------------------|
|                                 | N (%) / Mean (SD)  |                       |        | N (%) / Mean (SD)  |                       |                  |
| Name                            | Cases <sup>b</sup> | Controls <sup>c</sup> | Stdiff | Cases <sup>b</sup> | Controls <sup>c</sup> | Stdiff           |
| Total                           | 8,535              | 34,140                |        | 3,635              | 14,540                |                  |
| Follow-up Years, Mean (SD)      | 4.89 (2.91)        | 4.85 (2.95)           | 0.01   | 4.11 (2.52)        | 4.09 (2.54)           | 0.01             |
| Maternal Age (Years), Mean (SD) | 26.18 (6.17)       | 25.08 (6.05)          | 0.18   | 33.35 (4.60)       | 32.33 (4.60)          | 0.22             |
| Gender, N(%)                    |                    |                       |        |                    |                       |                  |
| Male                            | 5120 (59.99%)      | 16312 (47.78%)        | 0.25   | 2116 (58.21%)      | 7221 (49.66%)         | 0.17             |
| Female                          | 3231 (37.86%)      | 17629 (51.64%)        | -0.28  | 1368 (37.63%)      | 7194 (49.48%)         | -0.24            |
| Unknown                         | 184 (2.16%)        | 199 (0.58%)           | 0.14   | 151 (4.15%)        | 125 (0.86%)           | 0.21             |
| Region, N (%)                   |                    |                       |        |                    |                       |                  |
| Northeast                       | 4135 (48.45%)      | 16540 (48.45%)        | 0.00   | 985 (27.10%)       | 3940 (27.10%)         | 0.00             |
| Midwest                         | 2075 (24.31%)      | 8300 (24.31%)         | 0.00   | 892 (24.54%)       | 3568 (24.54%)         | 0.00             |
| South                           | 1536 (18.00%)      | 6144 (18.00%)         | 0.00   | 1172 (32.24%)      | 4688 (32.24%)         | 0.00             |
| West                            | 789 (9.24%)        | 3156 (9.24%)          | 0.00   | 565 (15.54%)       | 2260 (15.54%)         | 0.00             |
| Year of Birth, N (%)            |                    |                       |        |                    |                       |                  |
| Before 2006                     | 2226 (26.08%)      | 11601 (33.98%)        | -0.17  | 255 (7.02%)        | 1471 (10.12%)         | -0.11            |
| 2006-2009                       | 3295 (38.61%)      | 13140 (38.49%)        | 0.00   | 1096 (30.15%)      | 5143 (35.37%)         | -0.11            |
| After 2009                      | 3014 (35.31%)      | 9399 (27.53%)         | 0.17   | 2284 (62.83%)      | 7926 (54.51%)         | 0.17             |
| Race/Ethnicity, N (%)           |                    |                       |        |                    |                       |                  |
| White                           | 3875 (45.40%)      | 13440 (39.37%)        | 0.12   | N/A <sup>d</sup>   | N/A <sup>d</sup>      | N/A <sup>d</sup> |
| Black                           | 2090 (24.49%)      | 10928 (32.01%)        | -0.17  | N/A <sup>d</sup>   | N/A <sup>d</sup>      | N/A <sup>d</sup> |
| Hispanic/Latino                 | 647 (7.58%)        | 2832 (8.30%)          | -0.03  | N/A <sup>d</sup>   | N/A <sup>d</sup>      | N/A <sup>d</sup> |
| Asian/Pacific Islander          | 344 (4.03%)        | 1565 (4.58%)          | -0.03  | N/A <sup>d</sup>   | N/A <sup>d</sup>      | N/A <sup>d</sup> |
| Other/Unknown                   | 1579 (18.50%)      | 5375 (15.74%)         | 0.07   | N/A <sup>d</sup>   | N/A <sup>d</sup>      | N/A <sup>d</sup> |
| Maternal Conditions, N (%)      |                    |                       |        |                    |                       |                  |
| Pre-existing Hypertension       | 311 (3.64%)        | 649 (1.90%)           | 0.11   | 124 (3.41%)        | 341 (2.35%)           | 0.06             |
| Pre-eclampsia                   | 704 (8.25%)        | 1771 (5.19%)          | 0.12   | 413 (11.36%)       | 878 (6.04%)           | 0.19             |
| Pre-existing Diabetes           | 398 (4.66%)        | 849 (2.49%)           | 0.12   | 126 (3.47%)        | 345 (2.37%)           | 0.06             |
| Gestational Diabetes            | 12 (0.14%)         | 43 (0.13%)            | 0.00   | 6 (0.17%)          | 22 (0.15%)            | 0.00             |
| Obstetric Conditions, N (%)     |                    |                       |        |                    |                       |                  |
| Low Birth Weight                | 1391 (16.30%)      | 1456 (4.26%)          | 0.40   | 584 (16.07%)       | 458 (3.15%)           | 0.45             |
| Small for Gestational Age       | 523 (6.13%)        | 1050 (3.08%)          | 0.15   | 302 (8.31%)        | 400 (2.75%)           | 0.24             |
| Neonatal Hypoxia/Asphyxia       | 142 (1.66%)        | 267 (0.78%)           | 0.08   | 54 (1.49%)         | 84 (0.58%)            | 0.09             |
| Preterm Birth (>28 & <37 GW)    | 2172 (25.45%)      | 3279 (9.60%)          | 0.43   | 934 (25.69%)       | 1185 (8.15%)          | 0.48             |
| Very Preterm Birth (<=28 GW)    | 396 (4.64%)        | 179 (0.52%)           | 0.26   | 191 (5.25%)        | 66 (0.45%)            | 0.29             |
| Co-occurring NDDs               |                    |                       |        |                    |                       |                  |
| N Specific NDDs, Mean (SD)      | 1.87 (1.03)        | -                     | -      | 1.54 (0.81)        | -                     | -                |
| N Specific NDDs, N (%)          |                    |                       |        |                    |                       |                  |
| 1                               | 3950 (46.28%)      | -                     | -      | 2231 (61.38%)      | -                     | -                |
| 2                               | 2669 (31.27%)      | -                     | -      | 968 (26.63%)       | -                     | -                |
| 3                               | 1207 (14.14%)      | -                     | -      | 321 (8.83%)        | -                     | -                |

| Name                 | Public Insurance   |                       |        | Private Insurance  |                       |        |
|----------------------|--------------------|-----------------------|--------|--------------------|-----------------------|--------|
|                      | N (%) / Mean (SD)  |                       |        | N (%) / Mean (SD)  |                       |        |
|                      | Cases <sup>b</sup> | Controls <sup>c</sup> | Stdiff | Cases <sup>b</sup> | Controls <sup>c</sup> | Stdiff |
| 4                    | 521 (6.10%)        | -                     | -      | 94 (2.59%)         | -                     | -      |
| 5                    | 152 (1.78%)        | -                     | -      | 19 (0.52%)         | -                     | -      |
| 6                    | 33 (0.39%)         | -                     | -      | 2 (0.06%)          | -                     | -      |
| 7                    | <11                | -                     | -      | 0 (0.00%)          | -                     | -      |
| Specific NDDs, N (%) |                    |                       |        |                    |                       |        |
| ASD                  | 1130 (13.24%)      | -                     | -      | 358 (9.85%)        | -                     | -      |
| ADHD                 | 1163 (13.63%)      | -                     | -      | 281 (7.73%)        | -                     | -      |
| LD                   | 253 (2.96%)        | -                     | -      | 52 (1.43%)         | -                     | -      |
| SLD                  | 3782 (44.31%)      | -                     | -      | 1149 (31.61%)      | -                     | -      |
| DCD                  | 8535 (100.00%)     | -                     | -      | 3635 (100.00%)     | -                     | -      |
| ID                   | 292 (3.42%)        | -                     | -      | 18 (0.50%)         | -                     | -      |
| BD                   | 817 (9.57%)        | -                     | -      | 120 (3.30%)        | -                     | -      |

**G. Intellectual Disability**

|                                 | Public Insurance   |                       |        | Private Insurance  |                       |                  |
|---------------------------------|--------------------|-----------------------|--------|--------------------|-----------------------|------------------|
|                                 | N (%) / Mean (SD)  |                       |        | N (%) / Mean (SD)  |                       |                  |
| Name                            | Cases <sup>b</sup> | Controls <sup>c</sup> | Stdiff | Cases <sup>b</sup> | Controls <sup>c</sup> | Stdiff           |
| Total                           | 3,244              | 12,976                |        | 90                 | 360                   |                  |
| Follow-up Years, Mean (SD)      | 8.17 (2.77)        | 8.14 (2.78)           | 0.01   | 7.74 (2.57)        | 7.74 (2.56)           | 0.00             |
| Maternal Age (Years), Mean (SD) | 25.02 (6.05)       | 24.50 (6.03)          | 0.09   | 33.37 (4.64)       | 32.34 (4.25)          | 0.23             |
| Gender, N(%)                    |                    |                       |        |                    |                       |                  |
| Male                            | 2045 (63.04%)      | 5843 (45.03%)         | 0.37   | 50 (55.56%)        | 191 (53.06%)          | 0.05             |
| Female                          | 1130 (34.83%)      | 7012 (54.04%)         | -0.39  | 39 (43.33%)        | 166 (46.11%)          | -0.06            |
| Unknown                         | 69 (2.13%)         | 121 (0.93%)           | 0.10   | 1 (1.11%)          | 3 (0.83%)             | 0.03             |
| Region, N (%)                   |                    |                       |        |                    |                       |                  |
| Northeast                       | 471 (14.52%)       | 1884 (14.52%)         | 0.00   | 14 (15.56%)        | 56 (15.56%)           | 0.00             |
| Midwest                         | 896 (27.62%)       | 3584 (27.62%)         | 0.00   | 29 (32.22%)        | 116 (32.22%)          | 0.00             |
| South                           | 1238 (38.16%)      | 4952 (38.16%)         | 0.00   | 38 (42.22%)        | 152 (42.22%)          | 0.00             |
| West                            | 639 (19.70%)       | 2556 (19.70%)         | 0.00   | 9 (10.00%)         | 36 (10.00%)           | 0.00             |
| Year of Birth, N (%)            |                    |                       |        |                    |                       |                  |
| Before 2006                     | 2241 (69.08%)      | 9216 (71.02%)         | -0.04  | 28 (31.11%)        | 104 (28.89%)          | 0.05             |
| 2006-2009                       | 899 (27.71%)       | 3308 (25.49%)         | 0.05   | 45 (50.00%)        | 199 (55.28%)          | -0.11            |
| After 2009                      | 104 (3.21%)        | 452 (3.48%)           | -0.02  | 17 (18.89%)        | 57 (15.83%)           | 0.08             |
| Race/Ethnicity, N (%)           |                    |                       |        |                    |                       |                  |
| White                           | 1578 (48.64%)      | 5234 (40.34%)         | 0.17   | N/A <sup>d</sup>   | N/A <sup>d</sup>      | N/A <sup>d</sup> |
| Black                           | 990 (30.52%)       | 4727 (36.43%)         | -0.13  | N/A <sup>d</sup>   | N/A <sup>d</sup>      | N/A <sup>d</sup> |
| Hispanic/Latino                 | 274 (8.45%)        | 1196 (9.22%)          | -0.03  | N/A <sup>d</sup>   | N/A <sup>d</sup>      | N/A <sup>d</sup> |
| Asian/Pacific Islander          | 267 (8.23%)        | 1218 (9.39%)          | -0.04  | N/A <sup>d</sup>   | N/A <sup>d</sup>      | N/A <sup>d</sup> |
| Other/Unknown                   | 135 (4.16%)        | 601 (4.63%)           | -0.02  | N/A <sup>d</sup>   | N/A <sup>d</sup>      | N/A <sup>d</sup> |
| Maternal Conditions, N (%)      |                    |                       |        |                    |                       |                  |
| Pre-existing Hypertension       | 96 (2.96%)         | 273 (2.10%)           | 0.05   | 2 (2.22%)          | 14 (3.89%)            | -0.10            |
| Pre-eclampsia                   | 221 (6.81%)        | 706 (5.44%)           | 0.06   | 11 (12.22%)        | 30 (8.33%)            | 0.13             |
| Pre-existing Diabetes           | 149 (4.59%)        | 327 (2.52%)           | 0.11   | 3 (3.33%)          | 6 (1.67%)             | 0.11             |
| Gestational Diabetes            | <11                | 24 (0.18%)            | -0.01  | 0 (0.00%)          | 0 (0.00%)             | -                |
| Obstetric Conditions, N (%)     |                    |                       |        |                    |                       |                  |
| Low Birth Weight                | 411 (12.67%)       | 529 (4.08%)           | 0.31   | 14 (15.56%)        | 7 (1.94%)             | 0.49             |
| Small for Gestational Age       | 150 (4.62%)        | 341 (2.63%)           | 0.11   | 3 (3.33%)          | 5 (1.39%)             | 0.13             |
| Neonatal Hypoxia/Asphyxia       | 78 (2.40%)         | 108 (0.83%)           | 0.12   | 0 (0.00%)          | 2 (0.56%)             | -0.11            |
| Preterm Birth (>28 & <37 GW)    | 683 (21.05%)       | 1224 (9.43%)          | 0.33   | 18 (20.00%)        | 30 (8.33%)            | 0.34             |
| Very Preterm Birth (<=28 GW)    | 128 (3.95%)        | 73 (0.56%)            | 0.23   | 6 (6.67%)          | 3 (0.83%)             | 0.31             |
| Co-occurring NDDs               |                    |                       |        |                    |                       |                  |
| N Specific NDDs, Mean (SD)      | 2.47 (1.27)        | -                     | -      | 2.78 (1.26)        | -                     | -                |
| N Specific NDDs, N (%)          |                    |                       |        |                    |                       |                  |
| 1                               | 864 (26.63%)       | -                     | -      | 19 (21.11%)        | -                     | -                |
| 2                               | 992 (30.58%)       | -                     | -      | 18 (20.00%)        | -                     | -                |
| 3                               | 685 (21.12%)       | -                     | -      | 24 (26.67%)        | -                     | -                |

| Name                 | Public Insurance   |                       |        | Private Insurance  |                       |        |
|----------------------|--------------------|-----------------------|--------|--------------------|-----------------------|--------|
|                      | N (%) / Mean (SD)  |                       |        | N (%) / Mean (SD)  |                       |        |
|                      | Cases <sup>b</sup> | Controls <sup>c</sup> | Stdiff | Cases <sup>b</sup> | Controls <sup>c</sup> | Stdiff |
| 4                    | 450 (13.87%)       | -                     | -      | 23 (25.56%)        | -                     | -      |
| 5                    | 206 (6.35%)        | -                     | -      | 5 (5.56%)          | -                     | -      |
| 6                    | 44 (1.36%)         | -                     | -      | 1 (1.11%)          | -                     | -      |
| 7                    | <11                | -                     | -      | 0 (0.00%)          | -                     | -      |
| Specific NDDs, N (%) |                    |                       |        |                    |                       |        |
| ASD                  | 795 (24.51%)       | -                     | -      | 36 (40.00%)        | -                     | -      |
| ADHD                 | 1159 (35.73%)      | -                     | -      | 41 (45.56%)        | -                     | -      |
| LD                   | 246 (7.58%)        | -                     | -      | 4 (4.44%)          | -                     | -      |
| SLD                  | 1552 (47.84%)      | -                     | -      | 49 (54.44%)        | -                     | -      |
| DCD                  | 271 (8.35%)        | -                     | -      | 18 (20.00%)        | -                     | -      |
| ID                   | 3244 (100.00%)     | -                     | -      | 90 (100.00%)       | -                     | -      |
| BD                   | 751 (23.15%)       | -                     | -      | 12 (13.33%)        | -                     | -      |



## H. Behavioral Disorder

| Name                            | Public Insurance   |                       |        | Private Insurance  |                       |                  |
|---------------------------------|--------------------|-----------------------|--------|--------------------|-----------------------|------------------|
|                                 | N (%) / Mean (SD)  |                       | Stdiff | N (%) / Mean (SD)  |                       | Stdiff           |
|                                 | Cases <sup>b</sup> | Controls <sup>c</sup> |        | Cases <sup>b</sup> | Controls <sup>c</sup> |                  |
| Total                           | 32,850             | 131,400               |        | 2,973              | 11,892                |                  |
| Follow-up Years, Mean (SD)      | 7.52 (2.43)        | 7.44 (2.45)           | 0.03   | 7.23 (2.23)        | 7.22 (2.24)           | 0.01             |
| Maternal Age (Years), Mean (SD) | 23.85 (5.56)       | 24.41 (5.94)          | -0.10  | 32.42 (4.82)       | 32.34 (4.57)          | 0.02             |
| Gender, N(%)                    |                    |                       |        |                    |                       |                  |
| Male                            | 21449 (65.29%)     | 60760 (46.24%)        | 0.39   | 2082 (70.03%)      | 5963 (50.14%)         | 0.41             |
| Female                          | 10971 (33.40%)     | 69588 (52.96%)        | -0.40  | 834 (28.05%)       | 5833 (49.05%)         | -0.44            |
| Unknown                         | 430 (1.31%)        | 1052 (0.80%)          | 0.05   | 57 (1.92%)         | 96 (0.81%)            | 0.10             |
| Region, N (%)                   |                    |                       |        |                    |                       |                  |
| Northeast                       | 3816 (11.62%)      | 15264 (11.62%)        | 0.00   | 469 (15.78%)       | 1876 (15.78%)         | 0.00             |
| Midwest                         | 10241 (31.18%)     | 40964 (31.18%)        | 0.00   | 966 (32.49%)       | 3864 (32.49%)         | 0.00             |
| South                           | 11253 (34.26%)     | 45012 (34.26%)        | 0.00   | 1189 (39.99%)      | 4756 (39.99%)         | 0.00             |
| West                            | 7540 (22.95%)      | 30160 (22.95%)        | 0.00   | 333 (11.20%)       | 1332 (11.20%)         | 0.00             |
| Year of Birth, N (%)            |                    |                       |        |                    |                       |                  |
| Before 2006                     | 16333 (49.72%)     | 69251 (52.70%)        | -0.06  | 614 (20.65%)       | 2656 (22.33%)         | -0.04            |
| 2006-2009                       | 14428 (43.92%)     | 54258 (41.29%)        | 0.05   | 1756 (59.06%)      | 6872 (57.79%)         | 0.03             |
| After 2009                      | 2089 (6.36%)       | 7891 (6.01%)          | 0.01   | 603 (20.28%)       | 2364 (19.88%)         | 0.01             |
| Race/Ethnicity, N (%)           |                    |                       |        |                    |                       |                  |
| White                           | 15688 (47.76%)     | 47448 (36.11%)        | 0.24   | N/A <sup>d</sup>   | N/A <sup>d</sup>      | N/A <sup>d</sup> |
| Black                           | 10913 (33.22%)     | 52720 (40.12%)        | -0.14  | N/A <sup>d</sup>   | N/A <sup>d</sup>      | N/A <sup>d</sup> |
| Hispanic/Latino                 | 3951 (12.03%)      | 18649 (14.19%)        | -0.06  | N/A <sup>d</sup>   | N/A <sup>d</sup>      | N/A <sup>d</sup> |
| Asian/Pacific Islander          | 394 (1.20%)        | 4895 (3.73%)          | -0.16  | N/A <sup>d</sup>   | N/A <sup>d</sup>      | N/A <sup>d</sup> |
| Other/Unknown                   | 1904 (5.80%)       | 7688 (5.85%)          | 0.00   | N/A <sup>d</sup>   | N/A <sup>d</sup>      | N/A <sup>d</sup> |
| Maternal Conditions, N (%)      |                    |                       |        |                    |                       |                  |
| Pre-existing Hypertension       | 963 (2.93%)        | 2895 (2.20%)          | 0.05   | 87 (2.93%)         | 230 (1.93%)           | 0.06             |
| Pre-eclampsia                   | 1918 (5.84%)       | 6557 (4.99%)          | 0.04   | 274 (9.22%)        | 675 (5.68%)           | 0.14             |
| Pre-existing Diabetes           | 1023 (3.11%)       | 3131 (2.38%)          | 0.04   | 85 (2.86%)         | 288 (2.42%)           | 0.03             |
| Gestational Diabetes            | 55 (0.17%)         | 206 (0.16%)           | 0.00   | 1 (0.03%)          | 17 (0.14%)            | -0.04            |
| Obstetric Conditions, N (%)     |                    |                       |        |                    |                       |                  |
| Low Birth Weight                | 2004 (6.10%)       | 5532 (4.21%)          | 0.09   | 145 (4.88%)        | 364 (3.06%)           | 0.09             |
| Small for Gestational Age       | 1071 (3.26%)       | 3453 (2.63%)          | 0.04   | 85 (2.86%)         | 267 (2.25%)           | 0.04             |
| Neonatal Hypoxia/Asphyxia       | 331 (1.01%)        | 1151 (0.88%)          | 0.01   | 14 (0.47%)         | 81 (0.68%)            | -0.03            |
| Preterm Birth (>28 & <37 GW)    | 4187 (12.75%)      | 12585 (9.58%)         | 0.10   | 336 (11.30%)       | 889 (7.48%)           | 0.13             |
| Very Preterm Birth (<=28 GW)    | 310 (0.94%)        | 615 (0.47%)           | 0.06   | 37 (1.24%)         | 59 (0.50%)            | 0.08             |
| Co-occurring NDDs               |                    |                       |        |                    |                       |                  |
| N Specific NDDs, Mean (SD)      | 1.83 (0.83)        | -                     | -      | 1.80 (0.87)        | -                     | -                |
| N Specific NDDs, N (%)          |                    |                       |        |                    |                       |                  |
| 1                               | 12700 (38.66%)     | -                     | -      | 1294 (43.53%)      | -                     | -                |
| 2                               | 14753 (44.91%)     | -                     | -      | 1154 (38.82%)      | -                     | -                |
| 3                               | 4064 (12.37%)      | -                     | -      | 384 (12.92%)       | -                     | -                |

| Name                 | Public Insurance   |                       |        | Private Insurance  |                       |        |
|----------------------|--------------------|-----------------------|--------|--------------------|-----------------------|--------|
|                      | N (%) / Mean (SD)  |                       |        | N (%) / Mean (SD)  |                       |        |
|                      | Cases <sup>b</sup> | Controls <sup>c</sup> | Stdiff | Cases <sup>b</sup> | Controls <sup>c</sup> | Stdiff |
| 4                    | 1057 (3.22%)       | -                     | -      | 115 (3.87%)        | -                     | -      |
| 5                    | 239 (0.73%)        | -                     | -      | 24 (0.81%)         | -                     | -      |
| 6                    | 35 (0.11%)         | -                     | -      | 2 (0.07%)          | -                     | -      |
| 7                    | <11                | -                     | -      | 0 (0.00%)          | -                     | -      |
| Specific NDDs, N (%) |                    |                       |        |                    |                       |        |
| ASD                  | 2111 (6.43%)       | -                     | -      | 334 (11.23%)       | -                     | -      |
| ADHD                 | 17098 (52.05%)     | -                     | -      | 1223 (41.14%)      | -                     | -      |
| LD                   | 938 (2.86%)        | -                     | -      | 78 (2.62%)         | -                     | -      |
| SLD                  | 5878 (17.89%)      | -                     | -      | 607 (20.42%)       | -                     | -      |
| DCD                  | 685 (2.09%)        | -                     | -      | 119 (4.00%)        | -                     | -      |
| ID                   | 485 (1.48%)        | -                     | -      | 12 (0.40%)         | -                     | -      |
| BD                   | 32850 (100.00%)    | -                     | -      | 2973 (100.00%)     | -                     | -      |

Numbers <11 for MAX cohort suppressed in accord with the CMS cell size suppression policy.

Abbreviations: ADHD, attention deficit hyperactivity disorder and other hyperkinetic syndromes of childhood; ASD, autism spectrum disorder/pervasive developmental disorder; BD, behavioral disorder; DCD, developmental coordination disorder; ID, intellectual disability; LD, learning disability; N, number; NDD, neurodevelopmental disorder; SLD, speech/language disorder; SD, standard deviation; Stdiff, standardized difference.

<sup>a</sup>The following assessment periods were used for the respective covariates:

- First date of last menstrual period (LMP)-90 days to LMP+90 days: pre-existing hypertension
- LMP-90 days to LMP+140 days: pre-existing diabetes
- LMP+140 days to delivery: gestational diabetes
- LMP+140 days to delivery+30 days: pre-eclampsia
- delivery to delivery+30 days: preterm/very preterm birth, low birth weight, small for gestational age
- delivery hospitalization: neonatal hypoxia/asphyxia

<sup>b</sup>Cases include children with the specific NDD of interest.

<sup>c</sup>Controls consist of a sample without any NDD, which is defined using an extended definition that also includes other developmental, neurotic and personality disorders. For details, see eTable 1. Cases and controls were 1:4 matched on state and duration of follow-up after birth (+/- 60 days).

<sup>d</sup>Information on race/ethnicity not available in the privately insured cohort (MarketScan).

**eTable 3. Patient Characteristics Among Children, Stratified by Length of Continuous Enrollment, Separately for A) Publicly Insured Children and B) Privately Insured Children<sup>a</sup>**

| Name                                        | N (%) / Mean (SD) Among Children With Continuous Enrollment |                 |                 |                 |                 |                      |                  |                  |                  |                  |
|---------------------------------------------|-------------------------------------------------------------|-----------------|-----------------|-----------------|-----------------|----------------------|------------------|------------------|------------------|------------------|
|                                             | A) Public Insurance                                         |                 |                 |                 |                 | B) Private Insurance |                  |                  |                  |                  |
|                                             | <1 Year                                                     | >=1 & <2 Years  | >=2 & <5 Years  | >=5 & <8 Years  | >=8 Years       | <1 Year              | >=1 & <2 Years   | >=2 & <5 Years   | >=5 & <8 Years   | >=8 Years        |
| Total                                       | 402328                                                      | 545472          | 670836          | 280801          | 171262          | 395164               | 316901           | 412046           | 128816           | 57030            |
| Follow-up Years, Mean (SD)                  | 0.61 (0.23)                                                 | 1.41 (0.30)     | 3.24 (0.85)     | 6.30 (0.85)     | 9.89 (1.41)     | 0.61 (0.22)          | 1.48 (0.29)      | 3.22 (0.84)      | 6.25 (0.84)      | 9.52 (1.05)      |
| Maternal Age (Years) at Delivery, Mean (SD) | 24.64 (5.83)                                                | 24.30 (5.79)    | 24.32 (5.83)    | 24.50 (5.90)    | 24.60 (5.97)    | 31.74 (4.64)         | 31.88 (4.64)     | 32.09 (4.61)     | 32.18 (4.61)     | 32.33 (4.56)     |
| Gender, N (%)                               |                                                             |                 |                 |                 |                 |                      |                  |                  |                  |                  |
| Male                                        | 204030 (50.71%)                                             | 274040 (50.24%) | 339198 (50.56%) | 141464 (50.38%) | 86780 (50.67%)  | 201619 (51.02%)      | 161373 (50.92%)  | 210166 (51.01%)  | 65429 (50.79%)   | 29046 (50.93%)   |
| Female                                      | 195931 (48.70%)                                             | 265807 (48.73%) | 326068 (48.61%) | 136661 (48.67%) | 82776 (48.33%)  | 189647 (47.99%)      | 152493 (48.12%)  | 197838 (48.01%)  | 62095 (48.20%)   | 27406 (48.06%)   |
| Unknown                                     | 2367 (0.59%)                                                | 5625 (1.03%)    | 5570 (0.83%)    | 2676 (0.95%)    | 1706 (1.00%)    | 3898 (0.99%)         | 3035 (0.96%)     | 4042 (0.98%)     | 1292 (1.00%)     | 578 (1.01%)      |
| Region, N (%)                               |                                                             |                 |                 |                 |                 |                      |                  |                  |                  |                  |
| Northeast                                   | 73427 (18.25%)                                              | 97925 (17.95%)  | 111010 (16.55%) | 50341 (17.93%)  | 24313 (14.20%)  | 58432 (14.79%)       | 51351 (16.20%)   | 69911 (16.97%)   | 18130 (14.07%)   | 7929 (13.90%)    |
| Midwest                                     | 137295 (34.13%)                                             | 171907 (31.52%) | 219784 (32.76%) | 77767 (27.69%)  | 51889 (30.30%)  | 100988 (25.56%)      | 80221 (25.31%)   | 105045 (25.49%)  | 35710 (27.72%)   | 15847 (27.79%)   |
| South                                       | 101519 (25.23%)                                             | 166466 (30.52%) | 193975 (28.92%) | 84523 (30.10%)  | 55618 (32.48%)  | 154222 (39.03%)      | 122277 (38.59%)  | 161667 (39.24%)  | 53742 (41.72%)   | 26033 (45.65%)   |
| West                                        | 90087 (22.39%)                                              | 109174 (20.01%) | 146067 (21.77%) | 68170 (24.28%)  | 39442 (23.03%)  | 75194 (19.03%)       | 58801 (18.56%)   | 72012 (17.48%)   | 20331 (15.78%)   | 6914 (12.12%)    |
| Year of Birth, N (%)                        |                                                             |                 |                 |                 |                 |                      |                  |                  |                  |                  |
| Before 2006                                 | 96799 (24.06%)                                              | 142042 (26.04%) | 172727 (25.75%) | 79950 (28.47%)  | 147838 (86.32%) | 34702 (8.78%)        | 27463 (8.67%)    | 29317 (7.11%)    | 10146 (7.88%)    | 24413 (42.81%)   |
| 2006-2009                                   | 74124 (18.42%)                                              | 118910 (21.80%) | 213969 (31.90%) | 200851 (71.53%) | 23424 (13.68%)  | 103780 (26.26%)      | 78785 (24.86%)   | 107237 (26.03%)  | 85104 (66.07%)   | 32617 (57.19%)   |
| After 2009                                  | 231405 (57.52%)                                             | 284520 (52.16%) | 284140 (42.36%) | 0 (0.00%)       | 0 (0.00%)       | 256682 (64.96%)      | 210653 (66.47%)  | 275492 (66.86%)  | 33566 (26.06%)   | 0 (0.00%)        |
| Race/Ethnicity, N (%)                       |                                                             |                 |                 |                 |                 |                      |                  |                  |                  |                  |
| White                                       | 166670 (41.43%)                                             | 230532 (42.26%) | 273618 (40.79%) | 109613 (39.04%) | 65387 (38.18%)  | N/A <sup>b</sup>     | N/A <sup>b</sup> | N/A <sup>b</sup> | N/A <sup>b</sup> | N/A <sup>b</sup> |
| Black                                       | 123325 (30.65%)                                             | 173604 (31.83%) | 220343 (32.85%) | 98616 (35.12%)  | 66902 (39.06%)  | N/A <sup>b</sup>     | N/A <sup>b</sup> | N/A <sup>b</sup> | N/A <sup>b</sup> | N/A <sup>b</sup> |
| Hispanic/Latino                             | 60824 (15.12%)                                              | 73753 (13.52%)  | 97405 (14.52%)  | 40132 (14.29%)  | 23489 (13.72%)  | N/A <sup>b</sup>     | N/A <sup>b</sup> | N/A <sup>b</sup> | N/A <sup>b</sup> | N/A <sup>b</sup> |
| Asian/Pacific Islander                      | 14185 (3.53%)                                               | 19375 (3.55%)   | 24429 (3.64%)   | 10651 (3.79%)   | 7025 (4.10%)    | N/A <sup>b</sup>     | N/A <sup>b</sup> | N/A <sup>b</sup> | N/A <sup>b</sup> | N/A <sup>b</sup> |
| Other/Unknown                               | 37324 (9.28%)                                               | 48208 (8.84%)   | 55041 (8.20%)   | 21789 (7.76%)   | 8459 (4.94%)    | N/A <sup>b</sup>     | N/A <sup>b</sup> | N/A <sup>b</sup> | N/A <sup>b</sup> | N/A <sup>b</sup> |

|                                | N (%) / Mean (SD) Among Children With Continuous Enrollment |                   |                   |                   |                   |                      |                  |                  |                  |                 |
|--------------------------------|-------------------------------------------------------------|-------------------|-------------------|-------------------|-------------------|----------------------|------------------|------------------|------------------|-----------------|
|                                | A) Public Insurance                                         |                   |                   |                   |                   | B) Private Insurance |                  |                  |                  |                 |
| Name                           | <1 Year                                                     | >=1 & <2 Years    | >=2 & <5 Years    | >=5 & <8 Years    | >=8 Years         | <1 Year              | >=1 & <2 Years   | >=2 & <5 Years   | >=5 & <8 Years   | >=8 Years       |
| Maternal Conditions, N (%)     |                                                             |                   |                   |                   |                   |                      |                  |                  |                  |                 |
| Pre-existing Hypertension      | 10397<br>(2.58%)                                            | 13177<br>(2.42%)  | 16516<br>(2.46%)  | 6909<br>(2.46%)   | 3775<br>(2.20%)   | 8789<br>(2.22%)      | 7308<br>(2.31%)  | 9544<br>(2.32%)  | 2893<br>(2.25%)  | 1121<br>(1.97%) |
| Pre-eclampsia                  | 22107<br>(5.49%)                                            | 29482<br>(5.40%)  | 35964<br>(5.36%)  | 14636<br>(5.21%)  | 8671<br>(5.06%)   | 25269<br>(6.39%)     | 20105<br>(6.34%) | 25498<br>(6.19%) | 7824<br>(6.07%)  | 3202<br>(5.61%) |
| Pre-existing Diabetes          | 10441<br>(2.60%)                                            | 13796<br>(2.53%)  | 17916<br>(2.67%)  | 7240<br>(2.58%)   | 4364<br>(2.55%)   | 9065<br>(2.29%)      | 7477<br>(2.36%)  | 9839<br>(2.39%)  | 3018<br>(2.34%)  | 1223<br>(2.14%) |
| Gestational Diabetes           | 527<br>(0.13%)                                              | 793<br>(0.15%)    | 1024<br>(0.15%)   | 429<br>(0.15%)    | 242<br>(0.14%)    | 447<br>(0.11%)       | 355<br>(0.11%)   | 471<br>(0.11%)   | 154<br>(0.12%)   | 79<br>(0.14%)   |
| Obstetric Conditions, N (%)    |                                                             |                   |                   |                   |                   |                      |                  |                  |                  |                 |
| Low Birth Weight               | 23089<br>(5.74%)                                            | 27928<br>(5.12%)  | 32950<br>(4.91%)  | 14351<br>(5.11%)  | 8521<br>(4.98%)   | 15736<br>(3.98%)     | 11971<br>(3.78%) | 14752<br>(3.58%) | 4489<br>(3.48%)  | 1862<br>(3.26%) |
| Small for Gestational Age      | 16363<br>(4.07%)                                            | 20391<br>(3.74%)  | 22702<br>(3.38%)  | 8355<br>(2.98%)   | 4461<br>(2.60%)   | 14427<br>(3.65%)     | 11303<br>(3.57%) | 13021<br>(3.16%) | 3251<br>(2.52%)  | 1098<br>(1.93%) |
| Neonatal Hypoxia/Asphyxia      | 4041<br>(1.00%)                                             | 4864<br>(0.89%)   | 5598<br>(0.83%)   | 2321<br>(0.83%)   | 1776<br>(1.04%)   | 2912<br>(0.74%)      | 2264<br>(0.71%)  | 2745<br>(0.67%)  | 776<br>(0.60%)   | 404<br>(0.71%)  |
| Preterm Birth (>28 and <37 GW) | 48429<br>(12.04%)                                           | 60569<br>(11.10%) | 72579<br>(10.82%) | 29886<br>(10.64%) | 17928<br>(10.47%) | 36189<br>(9.16%)     | 28388<br>(8.96%) | 35622<br>(8.65%) | 11098<br>(8.62%) | 4808<br>(8.43%) |
| Very Preterm Birth (<=28 GW)   | 5644<br>(1.40%)                                             | 4478<br>(0.82%)   | 4769<br>(0.71%)   | 2066<br>(0.74%)   | 1285<br>(0.75%)   | 2652<br>(0.67%)      | 1937<br>(0.61%)  | 2281<br>(0.55%)  | 699<br>(0.54%)   | 394<br>(0.69%)  |

Abbreviations: GW, gestational weeks; N, number; N/A, not available; SD, standard deviation

<sup>a</sup>The following assessment periods were used for the respective covariates:

- First date of last menstrual period (LMP)-90 days to LMP+90 days: pre-existing hypertension
- LMP-90 days to LMP+140 days: pre-existing diabetes
- LMP+140 days to delivery: gestational diabetes
- LMP+140 days to delivery+30 days: pre-eclampsia
- delivery to delivery+30 days: preterm/very preterm birth, low birth weight, small for gestational age
- delivery hospitalization: neonatal hypoxia/asphyxia

<sup>b</sup>Information on race/ethnicity not available in the privately insured cohort (MarketScan).

**eFigure 1.** Cumulative Incidence Curves for Each of the Specific Neurodevelopmental Disorders of Interest, Stratified by Insurance Type, Child's Sex, Year of Birth, Maternal Age, and Race/Ethnicity

**A. Any Neurodevelopmental Disorder**

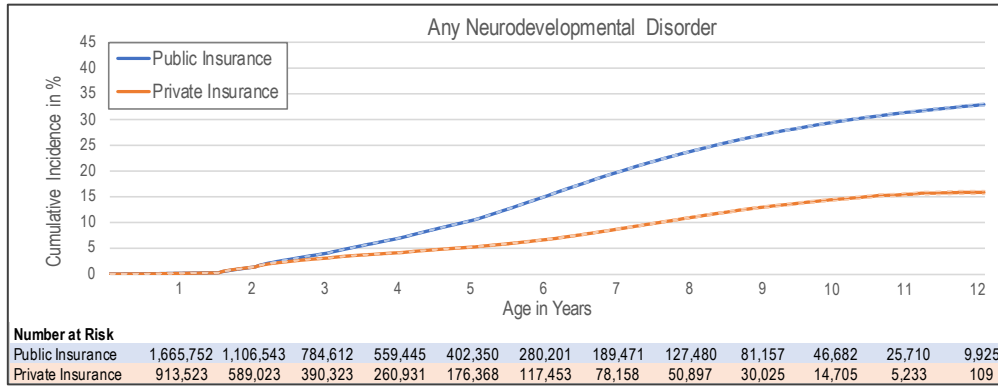

**Among Publicly Insured Children**

**Among Privately Insured Children**

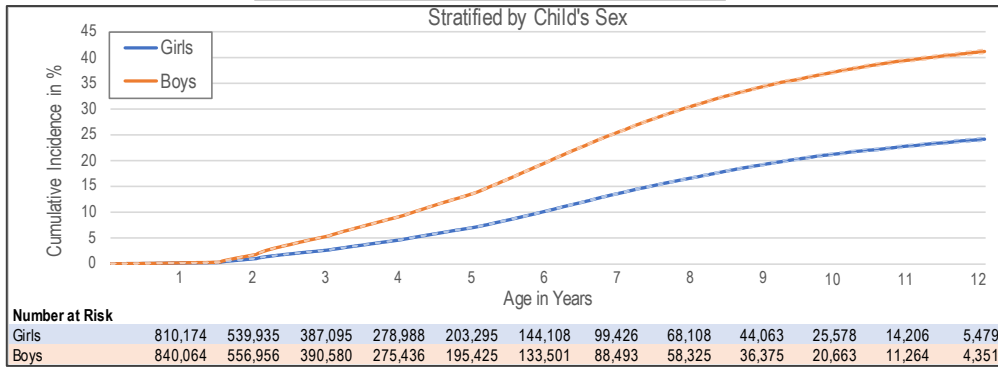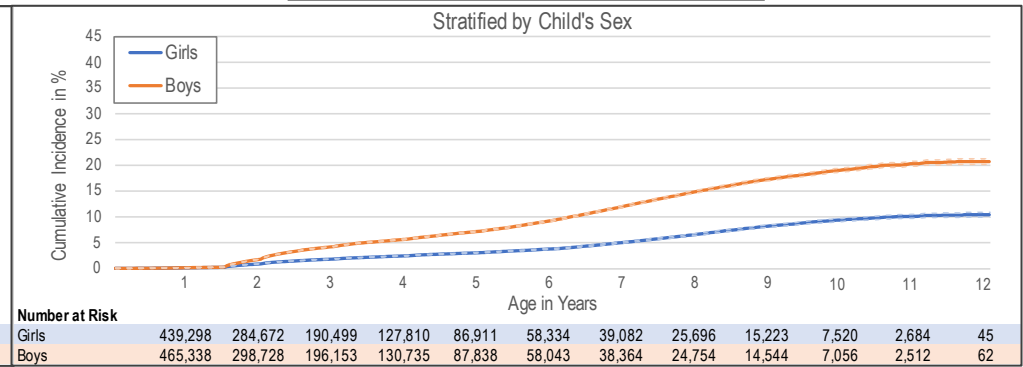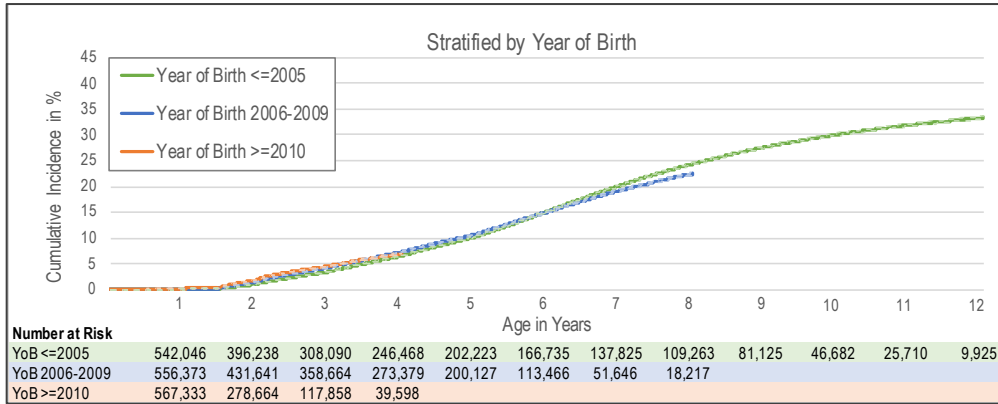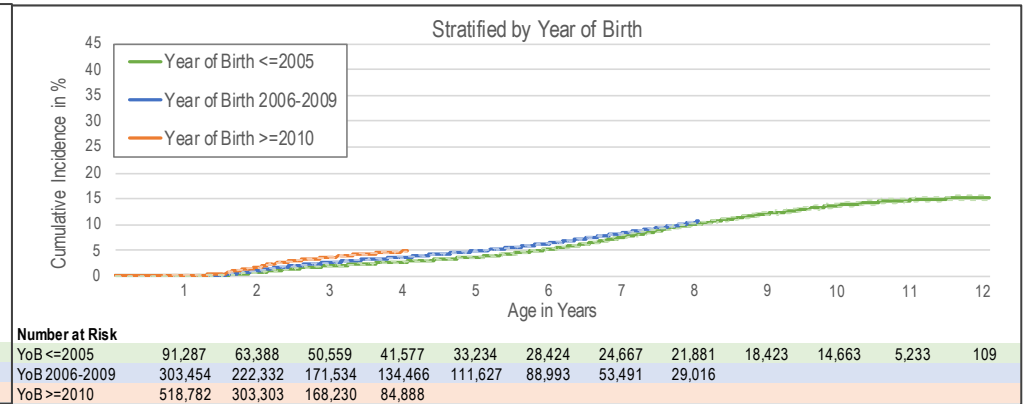

### Among Publicly Insured Children

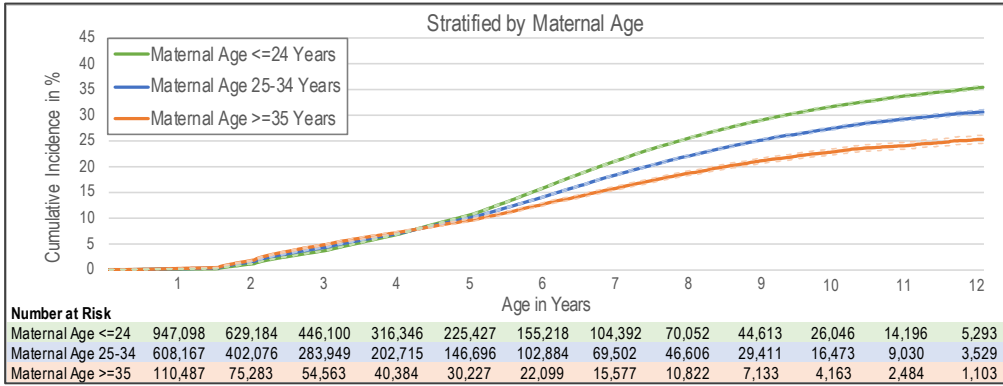

### Among Privately Insured Children

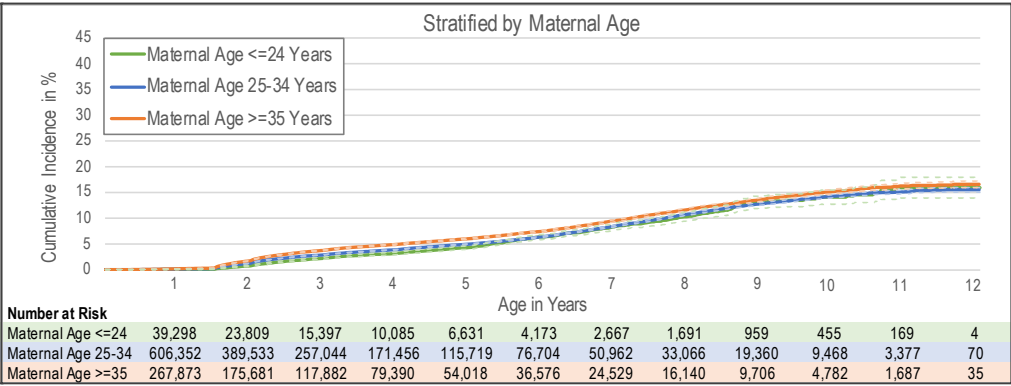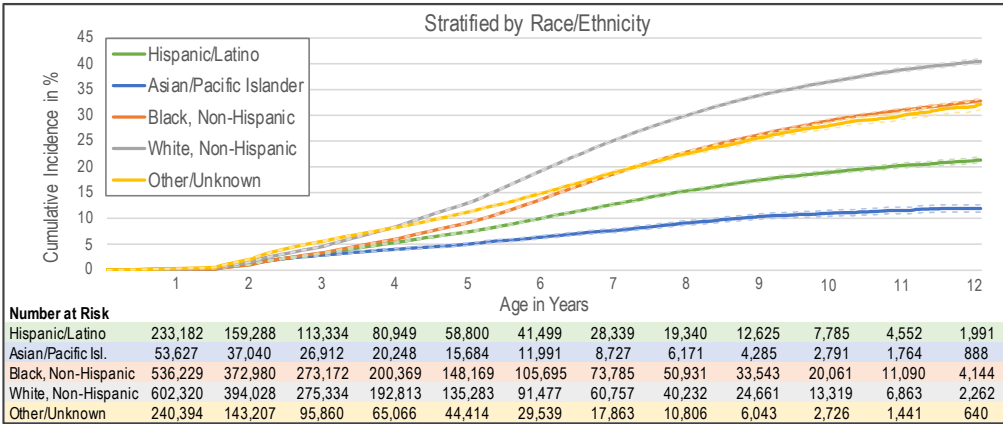

**eFigure 1.** Cumulative Incidence Curves for Each of the Specific Neurodevelopmental Disorders of Interest, Stratified by Insurance Type, Child's Sex, Year of Birth, Maternal Age and Race/Ethnicity (Continued)

**B. Autism Spectrum Disorder**

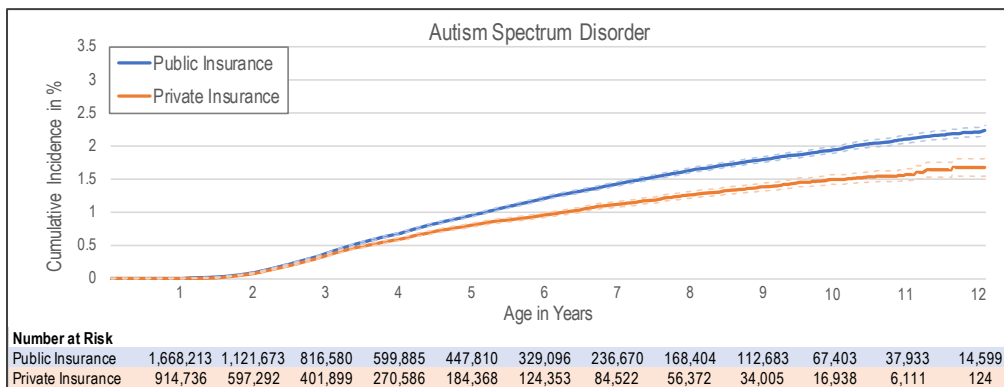

**Among Publicly Insured Children**

**Among Privately Insured Children**

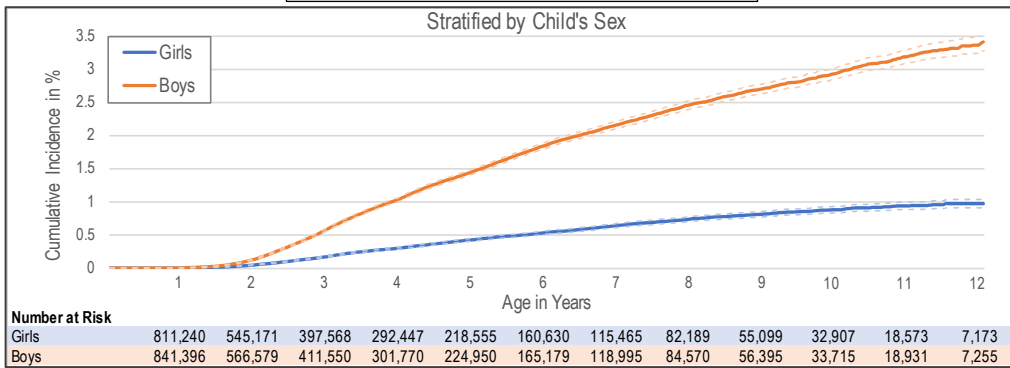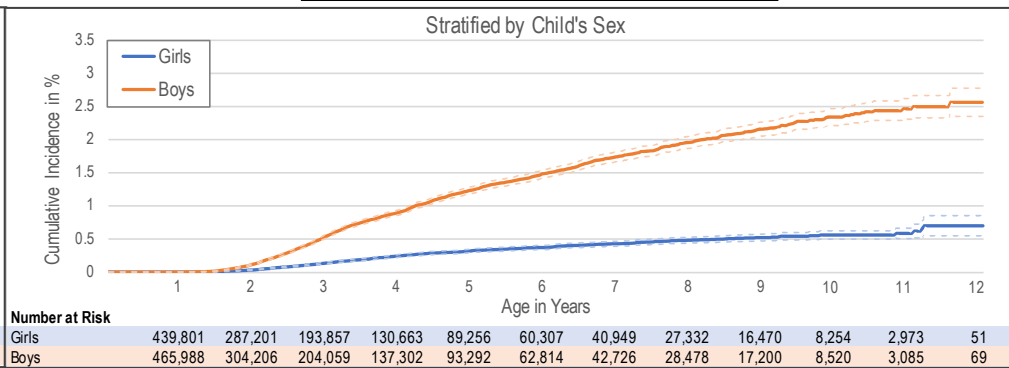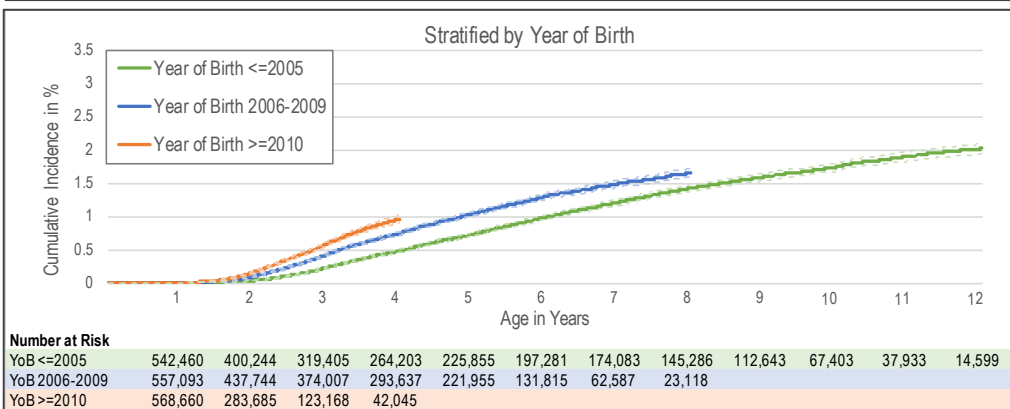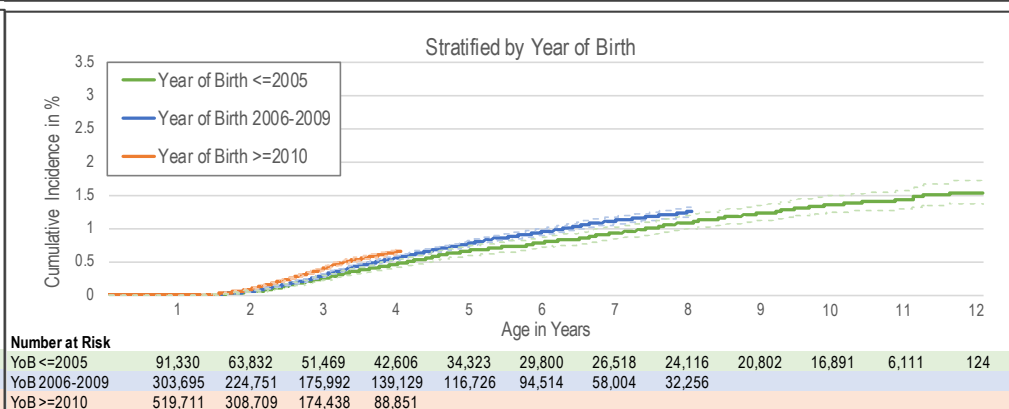

### Among Publicly Insured Children

Stratified by Maternal Age

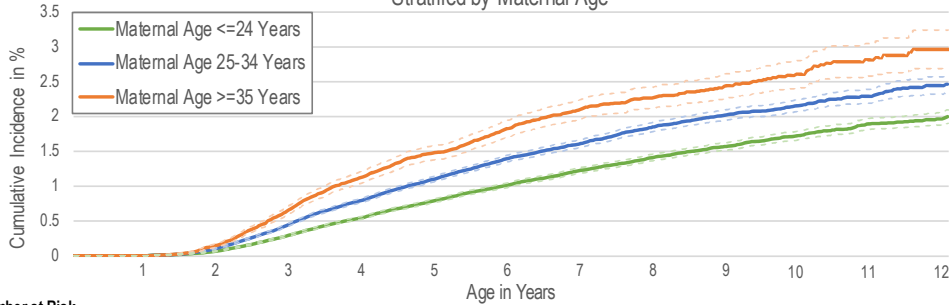

| Number at Risk     | 1       | 2       | 3       | 4       | 5       | 6       | 7       | 8      | 9      | 10     | 11     | 12    |
|--------------------|---------|---------|---------|---------|---------|---------|---------|--------|--------|--------|--------|-------|
| Maternal Age <=24  | 948,135 | 636,575 | 463,387 | 339,804 | 252,817 | 185,370 | 133,767 | 95,660 | 64,440 | 39,175 | 21,937 | 8,184 |
| Maternal Age 25-34 | 609,320 | 408,447 | 296,144 | 217,010 | 162,048 | 118,900 | 84,772  | 59,729 | 39,369 | 22,935 | 12,834 | 4,999 |
| Maternal Age >=35  | 110,758 | 76,651  | 57,049  | 43,071  | 32,945  | 24,826  | 18,131  | 13,015 | 8,874  | 5,293  | 3,162  | 1,416 |

### Among Privately Insured Children

Stratified by Maternal Age

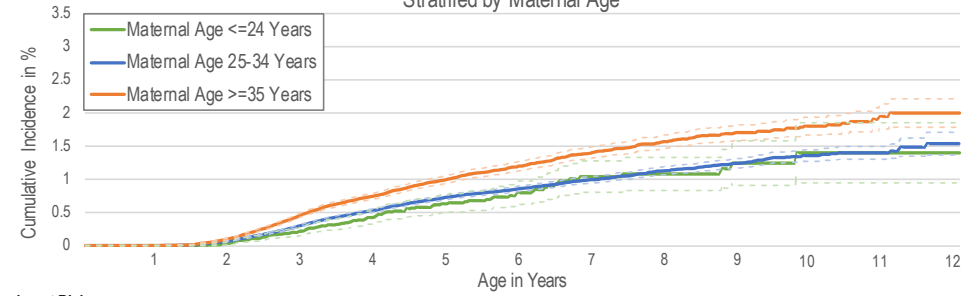

| Number at Risk     | 1       | 2       | 3       | 4       | 5       | 6      | 7      | 8      | 9      | 10     | 11    | 12 |
|--------------------|---------|---------|---------|---------|---------|--------|--------|--------|--------|--------|-------|----|
| Maternal Age <=24  | 39,313  | 23,987  | 15,740  | 10,381  | 6,880   | 4,426  | 2,889  | 1,867  | 1,084  | 524    | 194   | 4  |
| Maternal Age 25-34 | 607,065 | 394,479 | 264,105 | 177,436 | 120,744 | 81,031 | 55,049 | 36,616 | 21,897 | 10,899 | 3,945 | 81 |
| Maternal Age >=35  | 268,358 | 178,826 | 122,054 | 82,769  | 56,744  | 38,896 | 26,584 | 17,889 | 11,024 | 5,515  | 1,972 | 39 |

Stratified by Race/Ethnicity

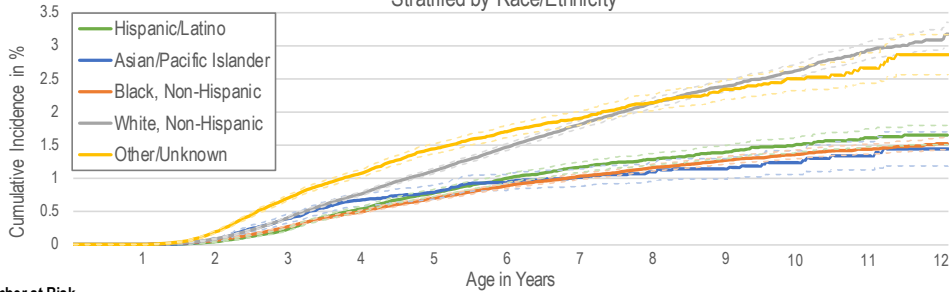

| Number at Risk      | 1       | 2       | 3       | 4       | 5       | 6       | 7      | 8      | 9      | 10     | 11     | 12    |
|---------------------|---------|---------|---------|---------|---------|---------|--------|--------|--------|--------|--------|-------|
| Hispanic/Latino     | 233,433 | 161,017 | 117,022 | 85,214  | 63,167  | 45,805  | 32,375 | 22,788 | 15,256 | 9,574  | 5,674  | 2,490 |
| Asian/Pacific Isl.  | 53,710  | 37,497  | 27,592  | 20,900  | 16,345  | 12,664  | 9,343  | 6,704  | 4,722  | 3,090  | 1,956  | 983   |
| Black, Non-Hispanic | 536,681 | 376,793 | 282,487 | 213,045 | 163,115 | 122,687 | 91,172 | 66,608 | 46,056 | 28,653 | 16,214 | 6,134 |
| White, Non-Hispanic | 603,323 | 400,148 | 288,286 | 210,238 | 155,451 | 113,489 | 81,738 | 58,229 | 38,275 | 22,021 | 11,861 | 3,981 |
| Other/Unknown       | 241,066 | 146,218 | 101,193 | 70,488  | 49,732  | 34,451  | 22,042 | 14,075 | 8,374  | 4,065  | 2,228  | 1,011 |



**eFigure 1.** Cumulative Incidence Curves for Each of the Specific Neurodevelopmental Disorders of Interest, Stratified by Insurance Type, Child's Sex, Year of Birth, Maternal Age and Race/Ethnicity (Continued)

**C. Attention Deficit Hyperactivity Disorder**

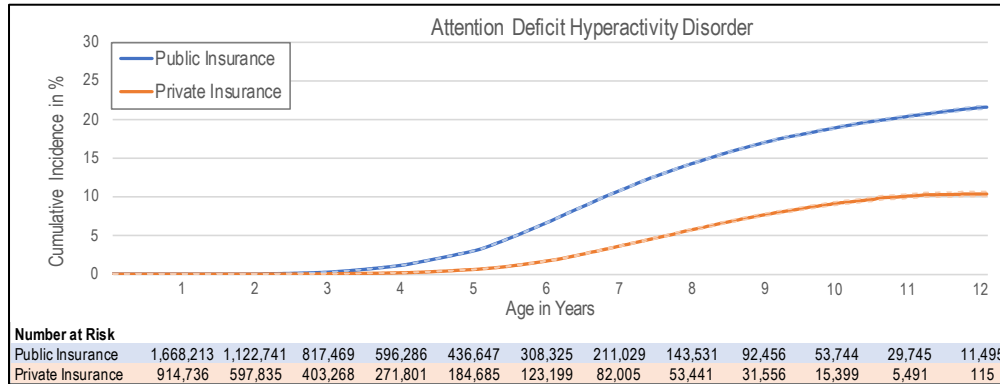

**Among Publicly Insured Children**

**Among Privately Insured Children**

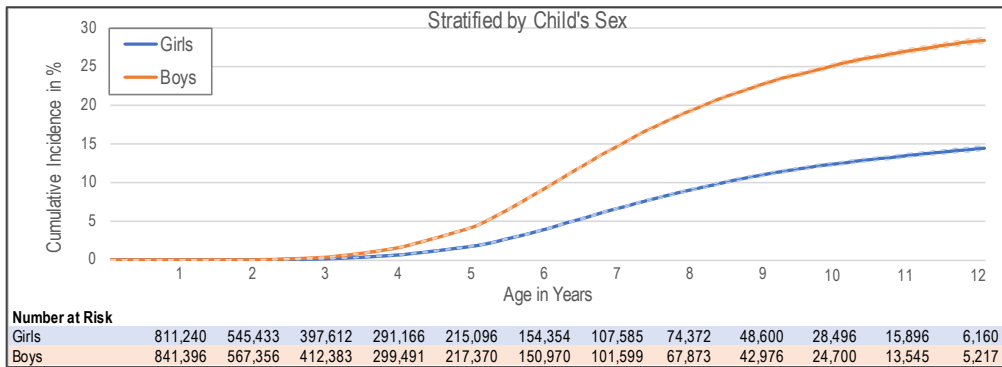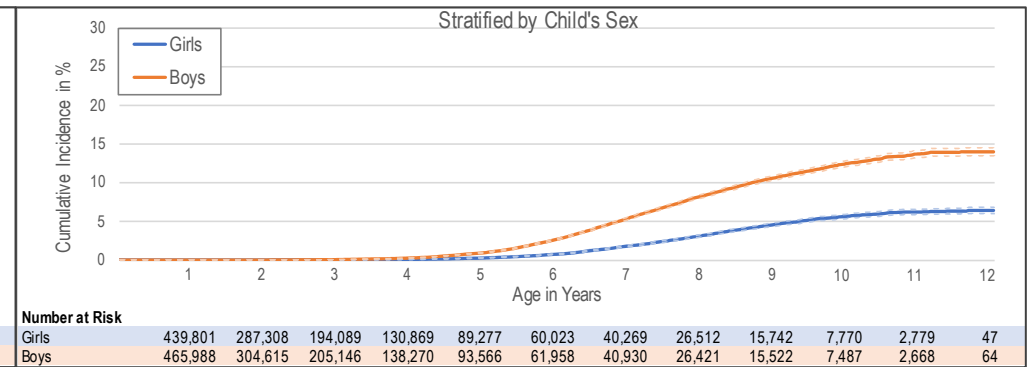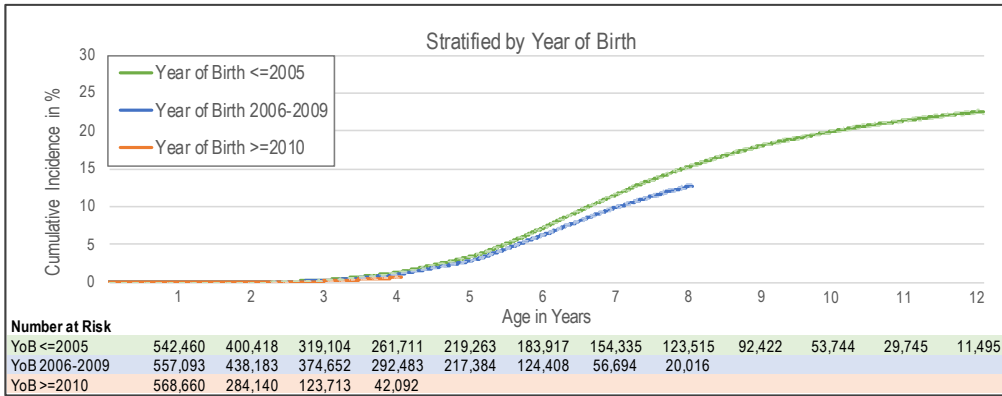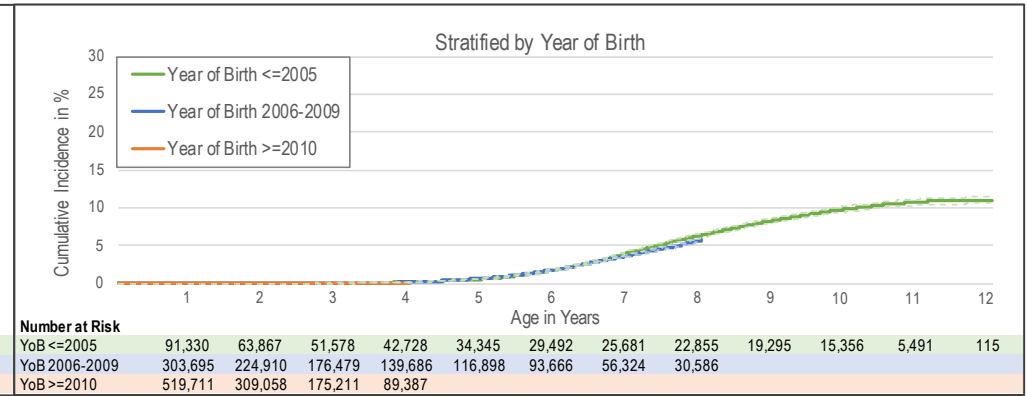

### Among Publicly Insured Children

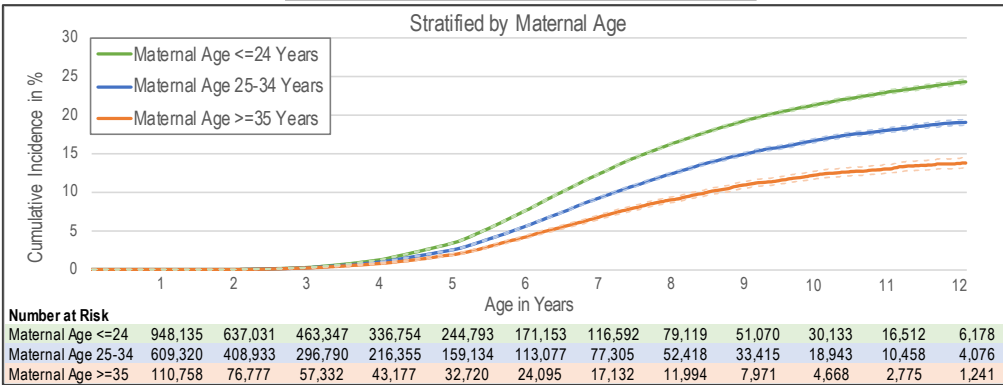

### Among Privately Insured Children

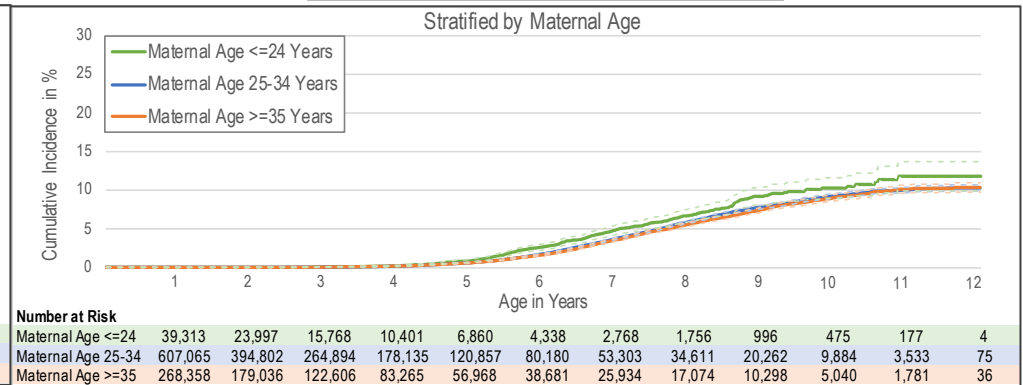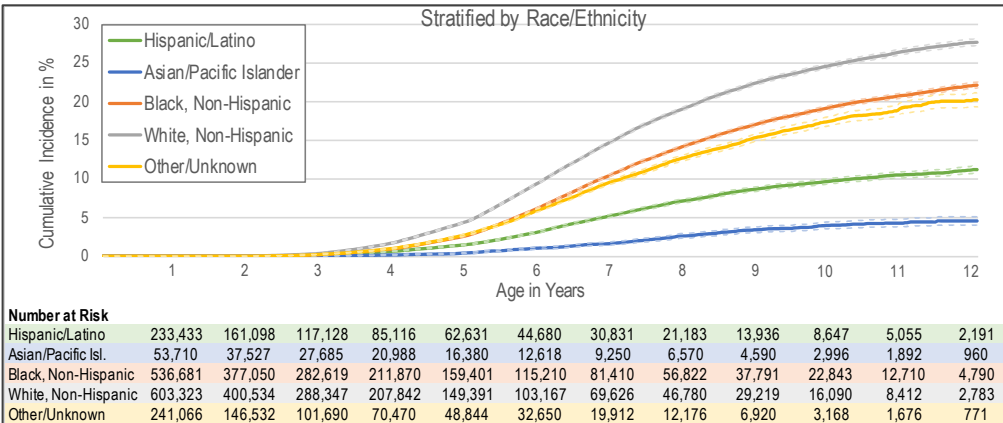

**eFigure 1.** Cumulative Incidence Curves for Each of the Specific Neurodevelopmental Disorders of Interest, Stratified by Insurance Type, Child's Sex, Year of Birth, Maternal Age and Race/Ethnicity (Continued)

**D. Learning Disability**

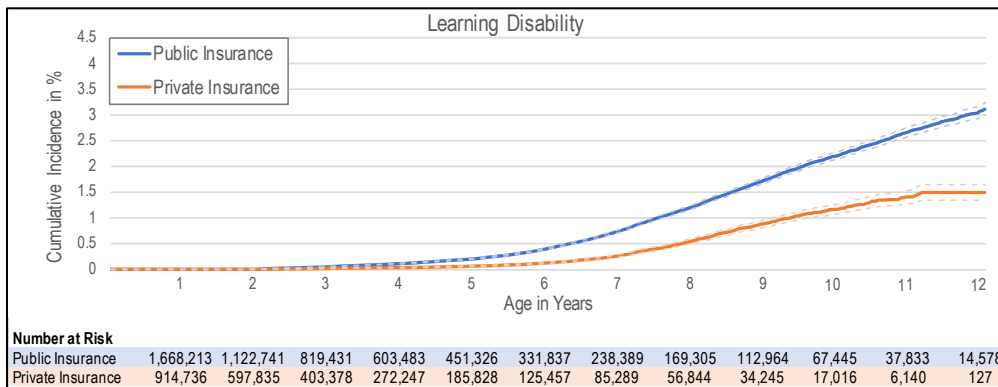

**Among Publicly Insured Children**

**Among Privately Insured Children**

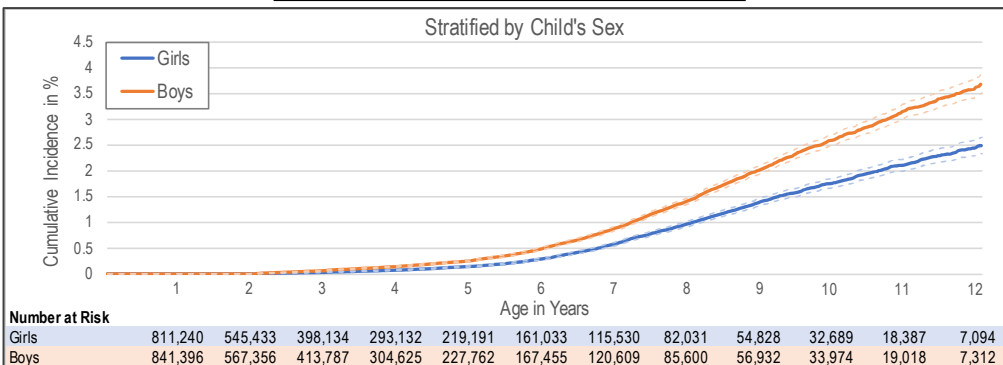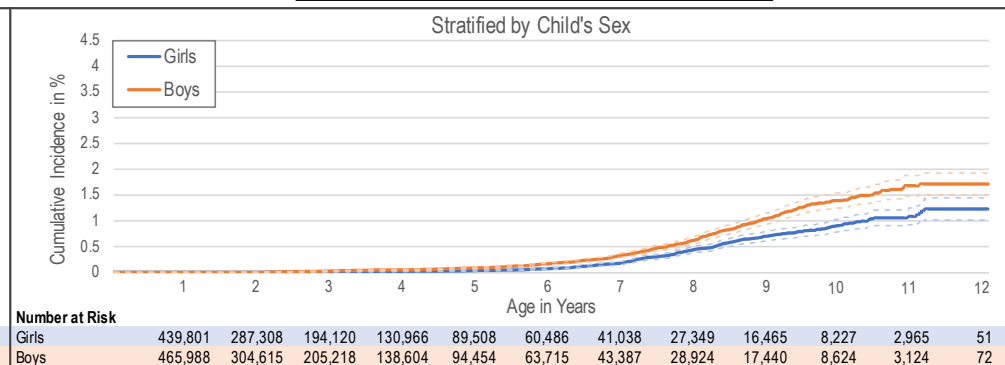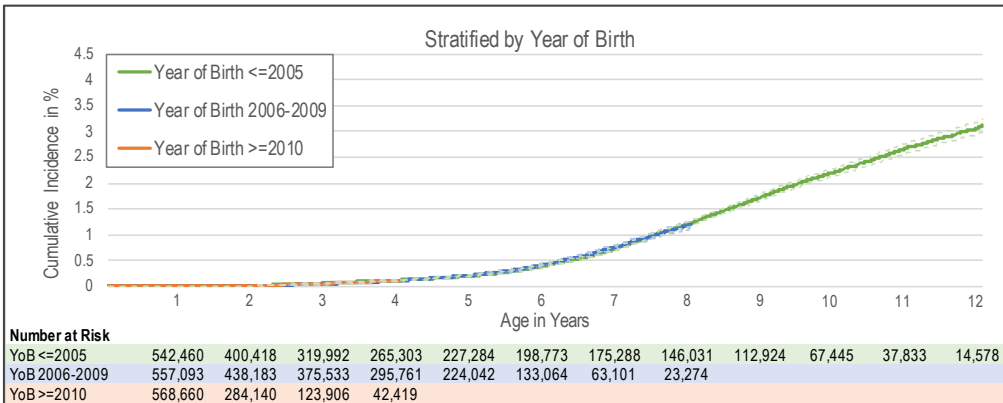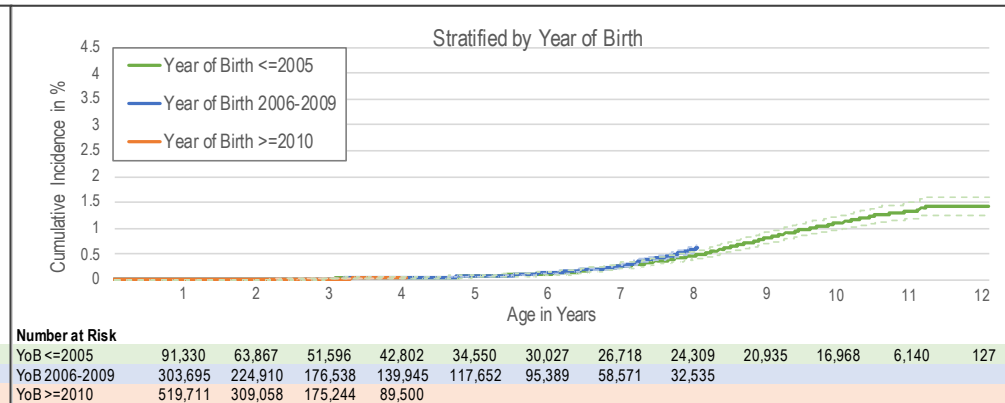

### Among Publicly Insured Children

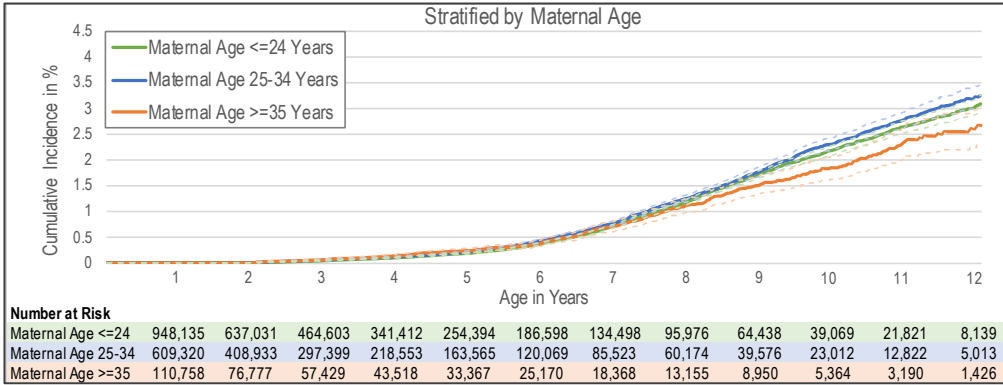

### Among Privately Insured Children

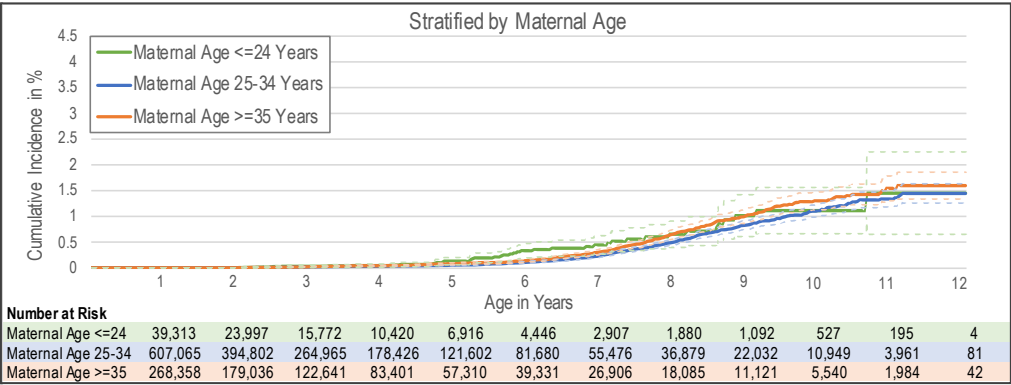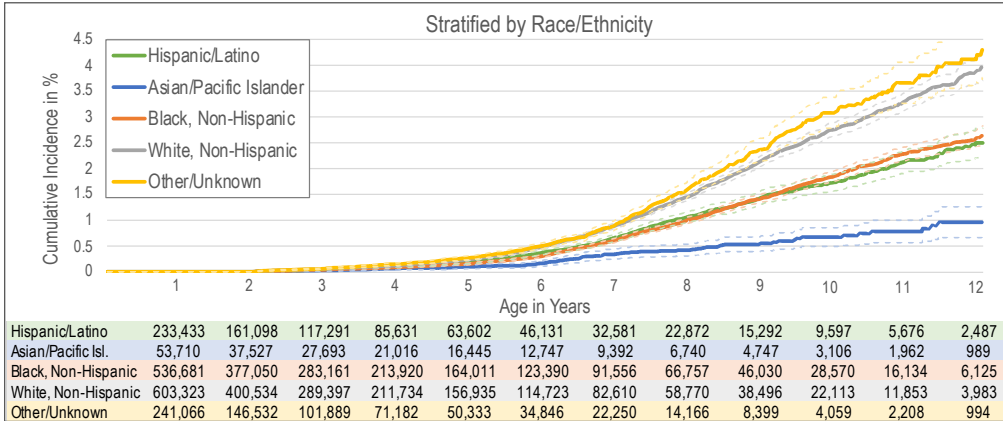

**eFigure 1.** Cumulative Incidence Curves for Each of the Specific Neurodevelopmental Disorders of Interest, Stratified by Insurance Type, Child's Sex, Year of Birth, Maternal Age and Race/Ethnicity (Continued)

**E. Developmental Speech/Language Disorder**

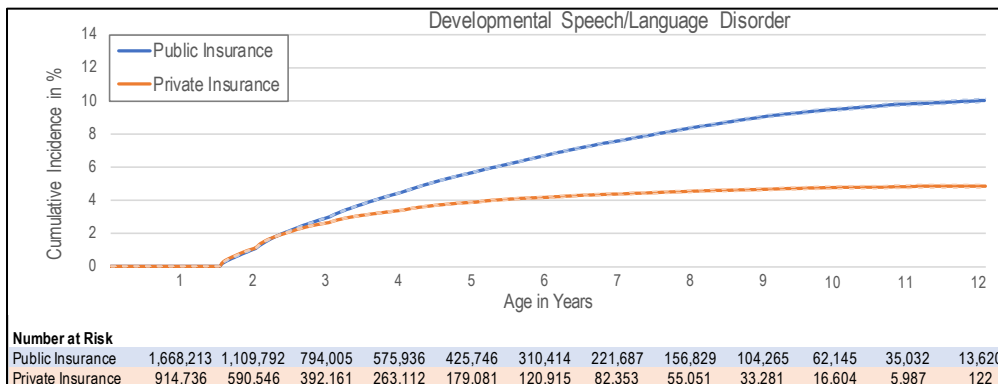

**Among Publicly Insured Children**

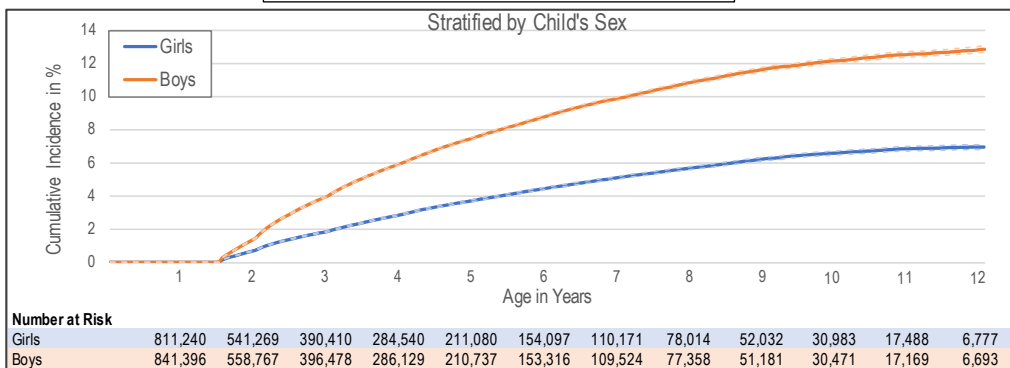

**Among Privately Insured Children**

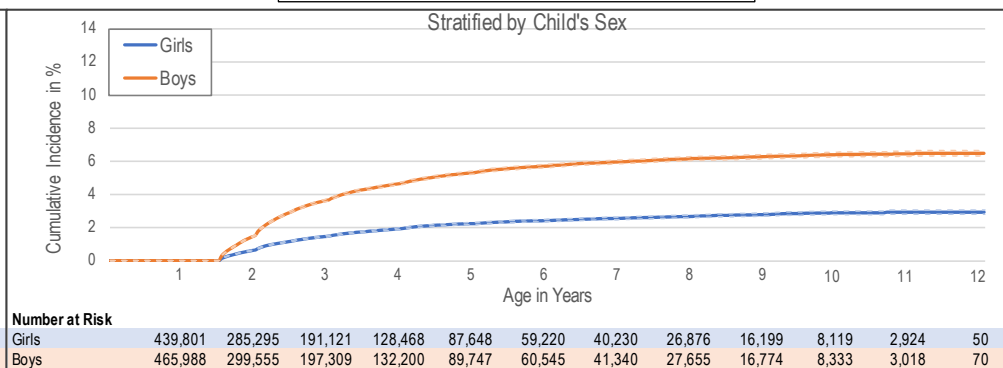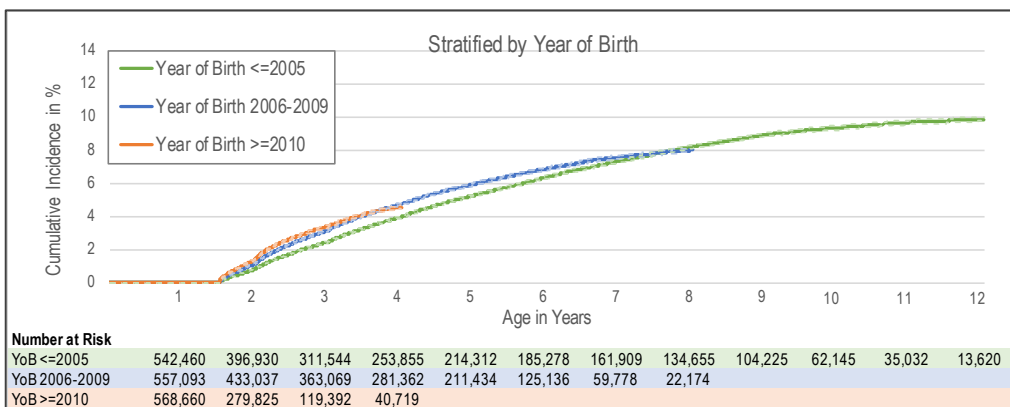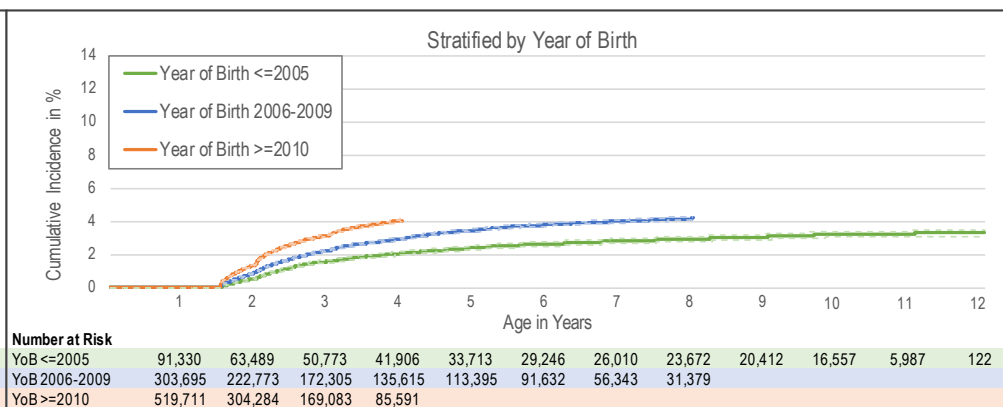

**Among Publicly Insured Children**

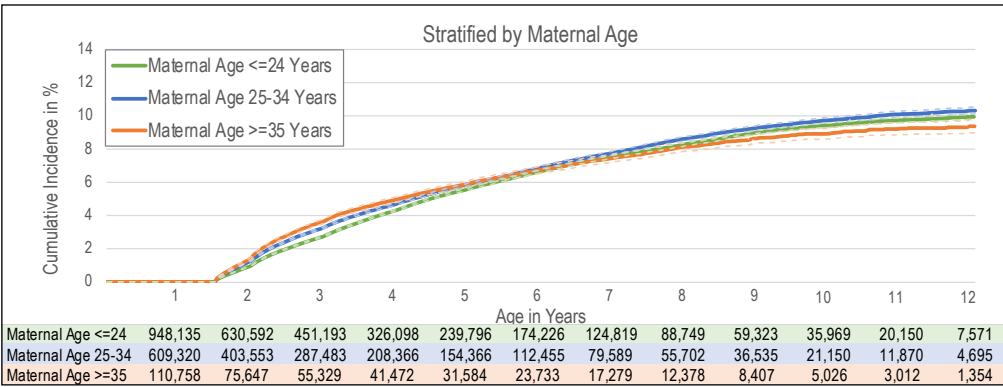

**Among Privately Insured Children**

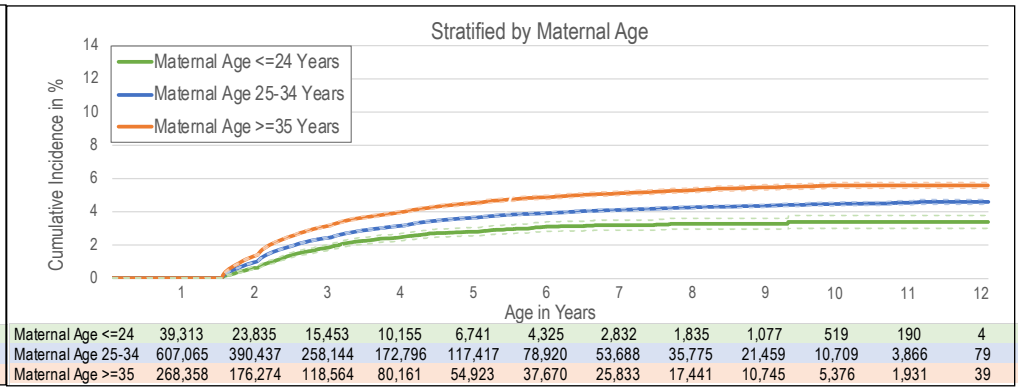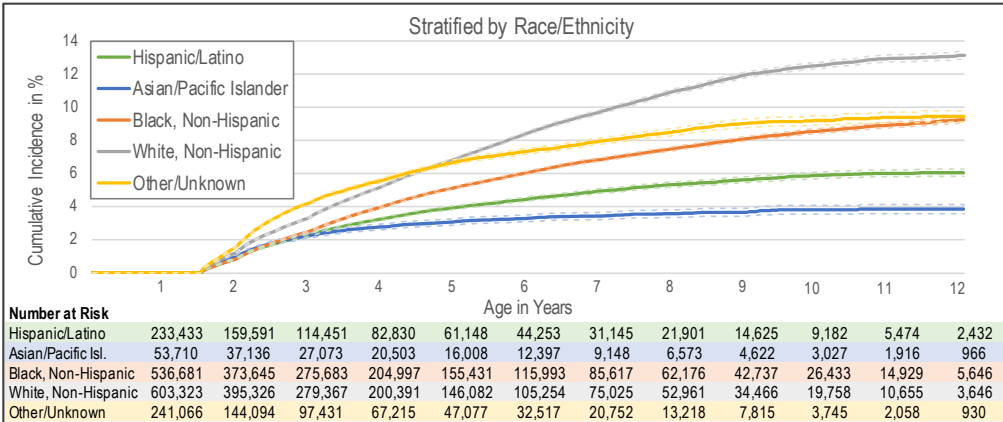

**eFigure 1.** Cumulative Incidence Curves for Each of the Specific Neurodevelopmental Disorders of Interest, Stratified by Insurance Type, Child's Sex, Year of Birth, Maternal Age and Race/Ethnicity (Continued)

**F. Developmental Coordination Disorder**

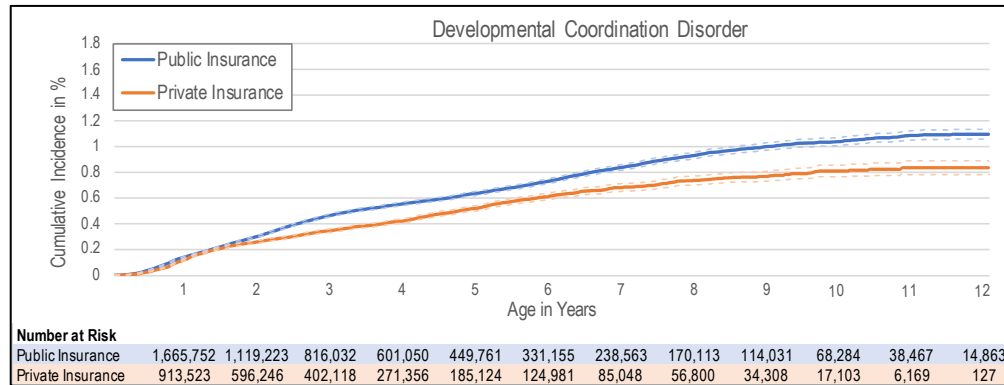

**Among Publicly Insured Children**

**Among Privately Insured Children**

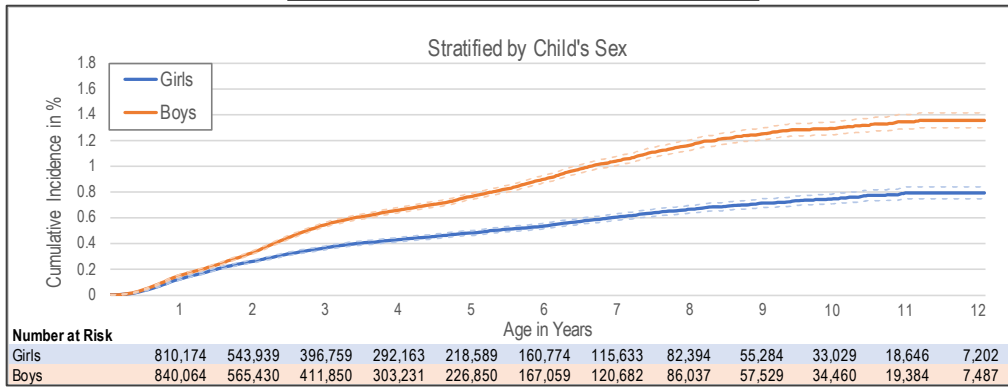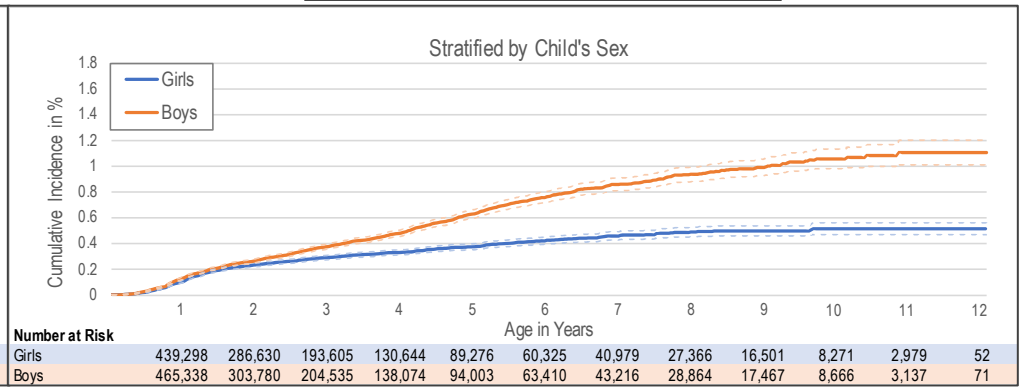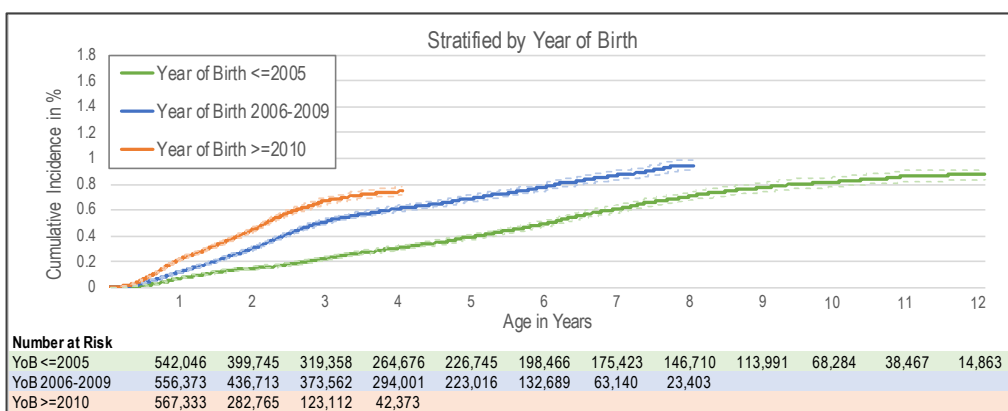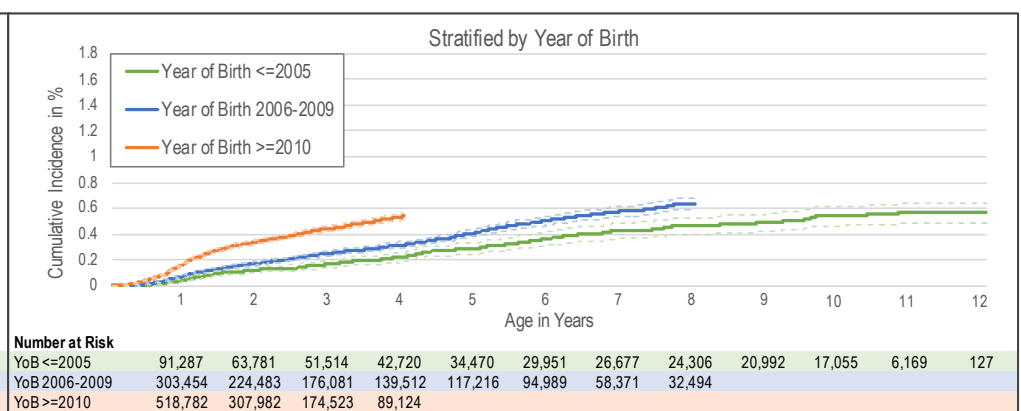

**Among Publicly Insured Children**

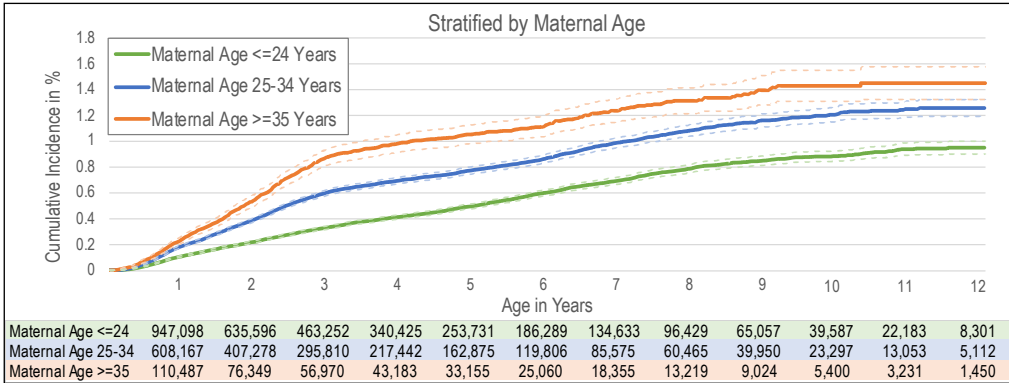

**Among Privately Insured Children**

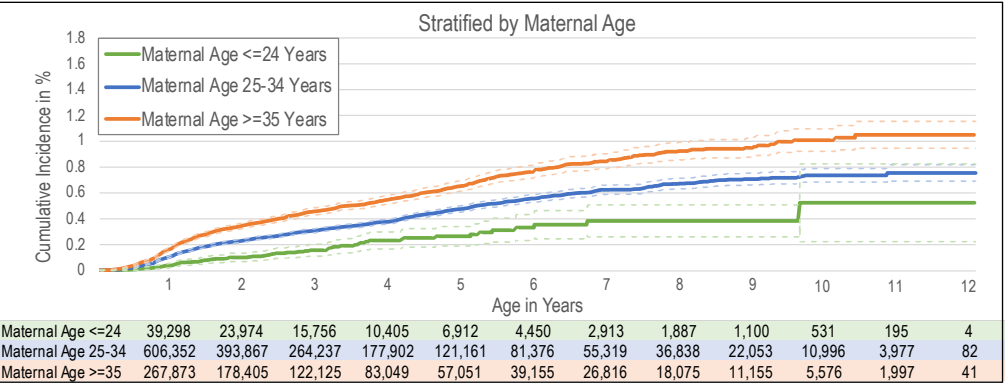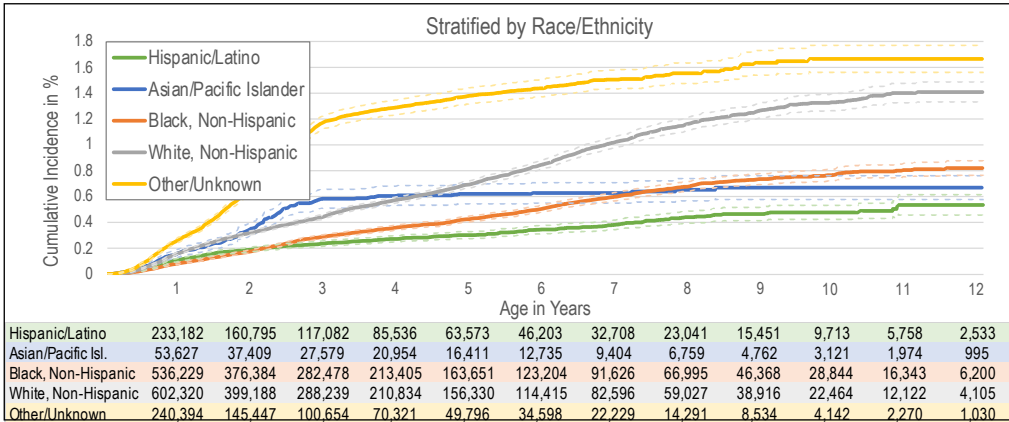



**eFigure 1.** Cumulative Incidence Curves for Each of the Specific Neurodevelopmental Disorders of Interest, Stratified by Insurance Type, Child's Sex, Year of Birth, Maternal Age and Race/Ethnicity (Continued)

**G. Intellectual Disability**

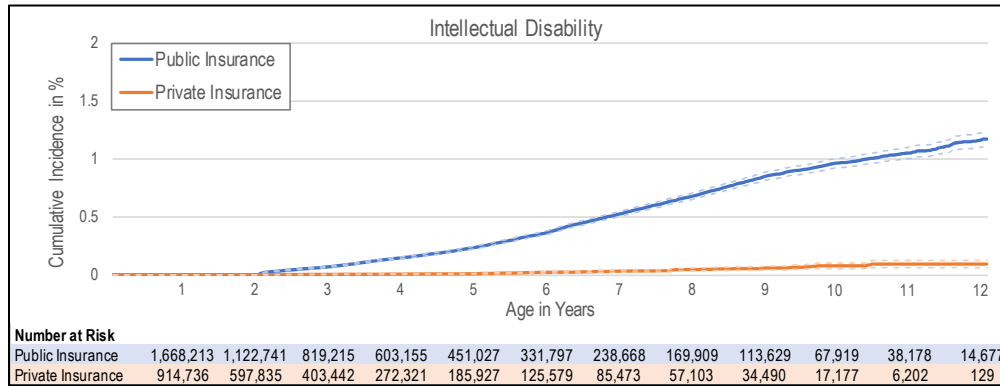

**Among Publicly Insured Children**

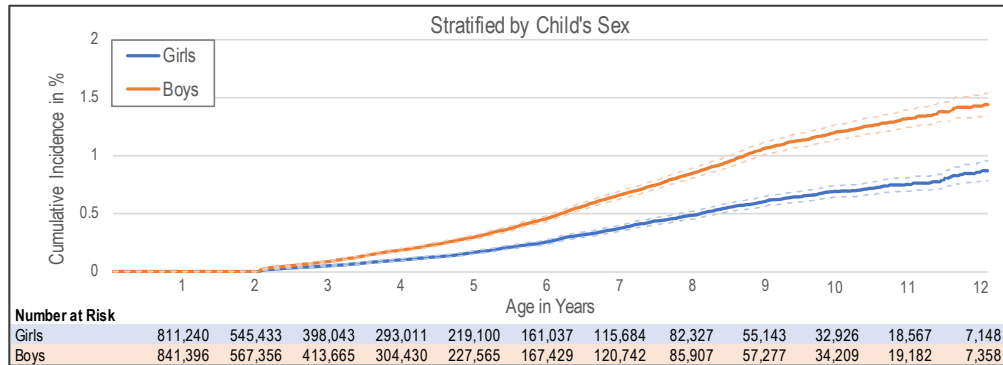

**Among Privately Insured Children**

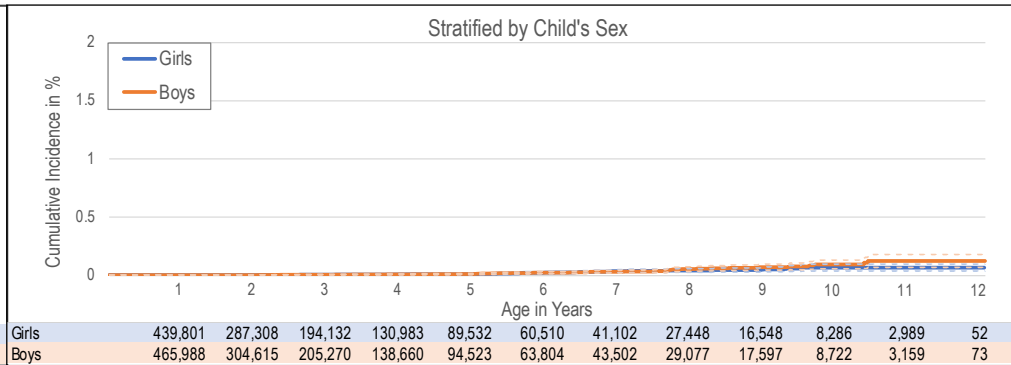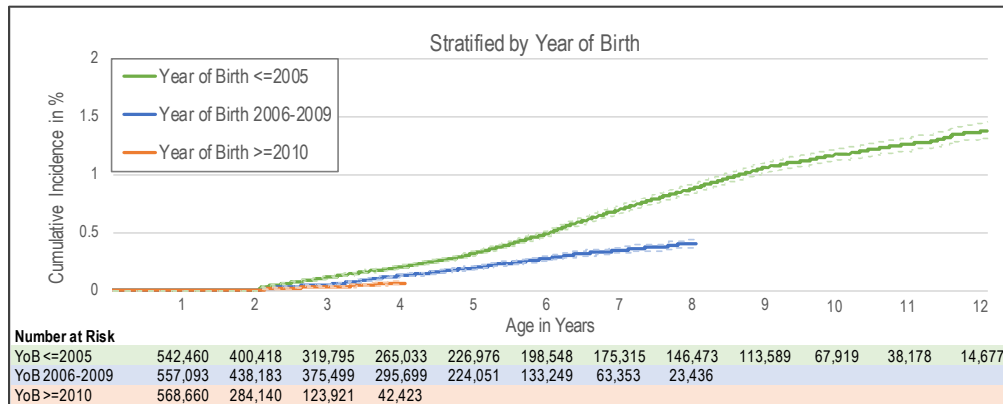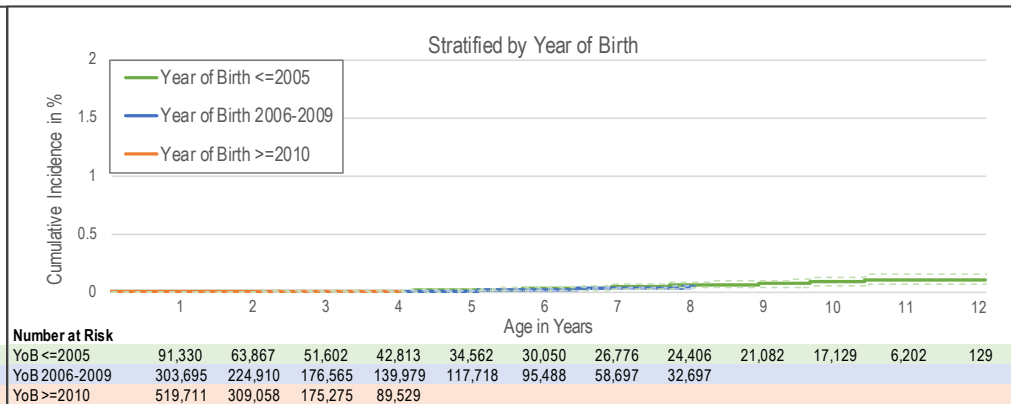

### Among Publicly Insured Children

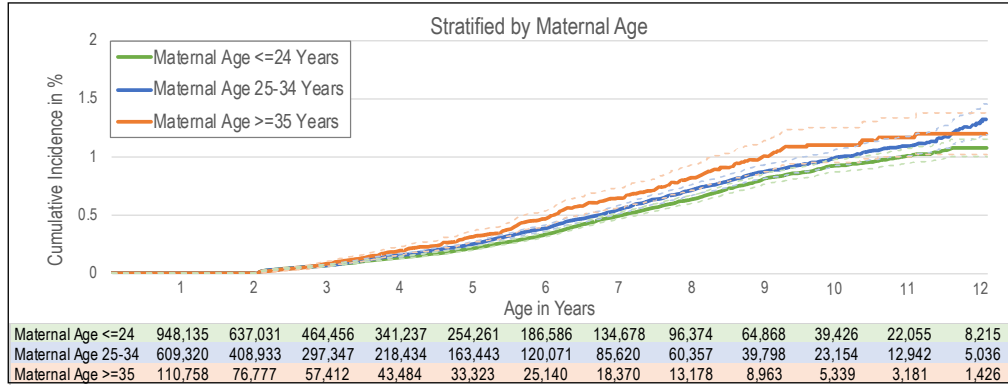

### Among Privately Insured Children

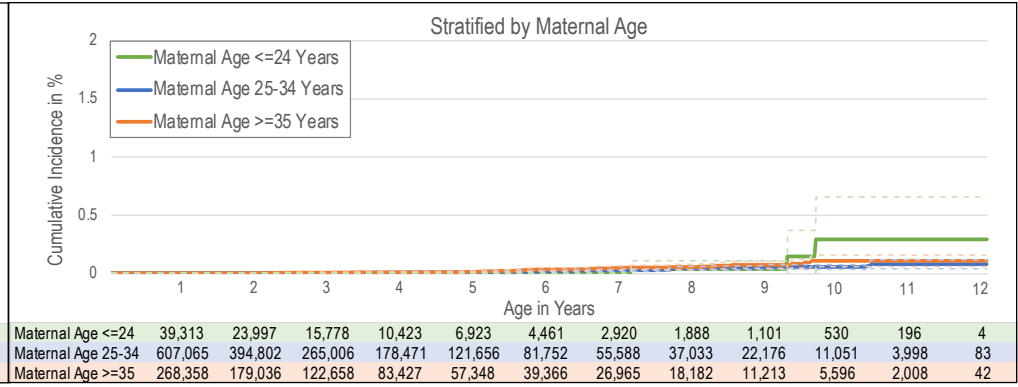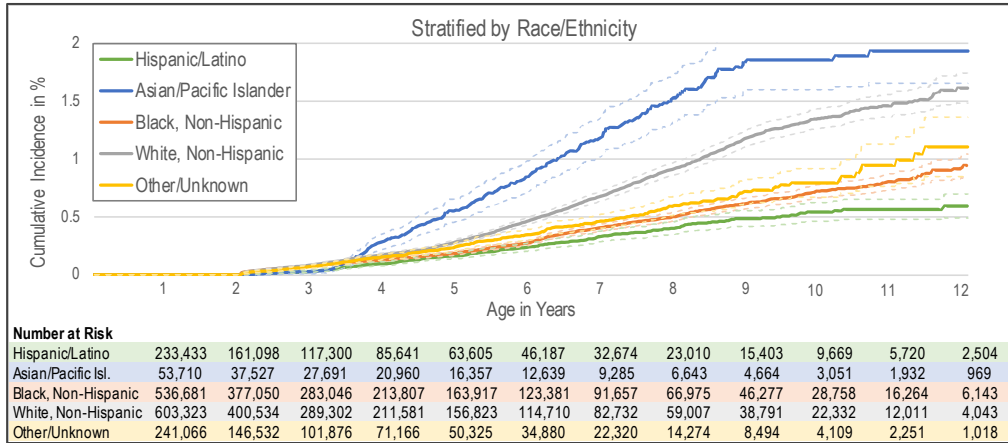

**eFigure 1.** Cumulative Incidence Curves for Each of the Specific Neurodevelopmental Disorders of Interest, Stratified by Insurance Type, Child's Sex, Year of Birth, Maternal Age and Race/Ethnicity (Continued)

**H. Behavioral Disorder**

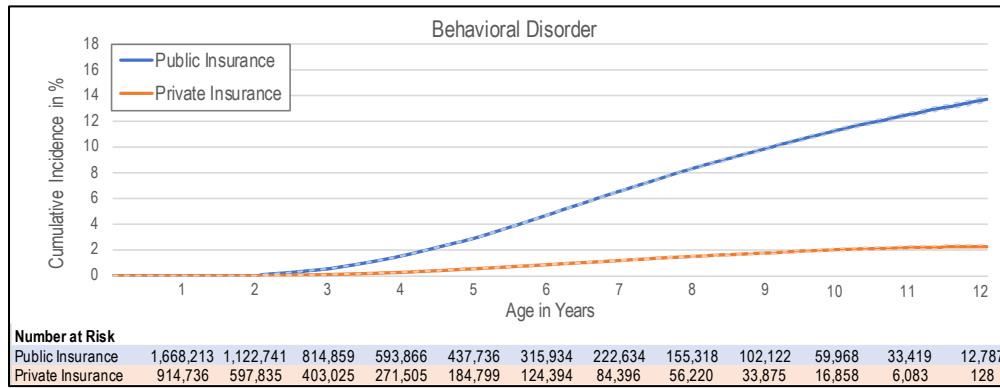

**Among Publicly Insured Children**

**Among Privately Insured Children**

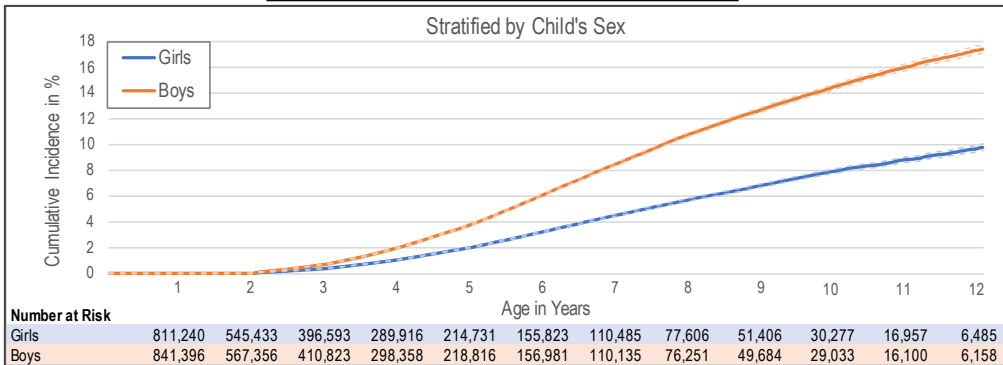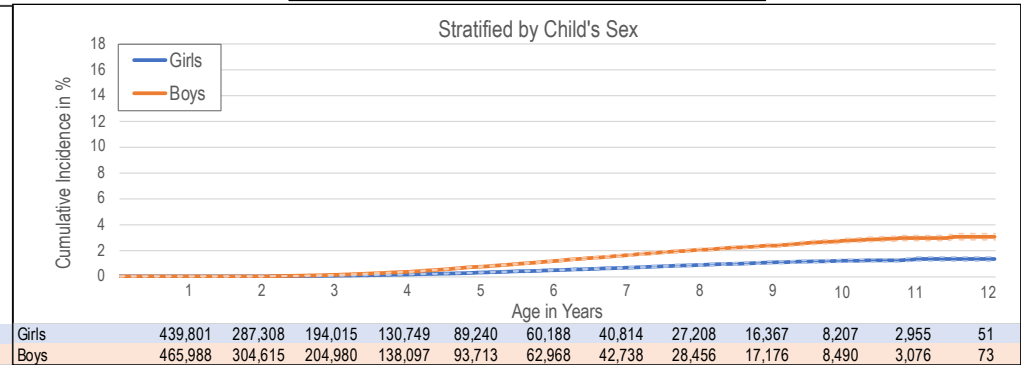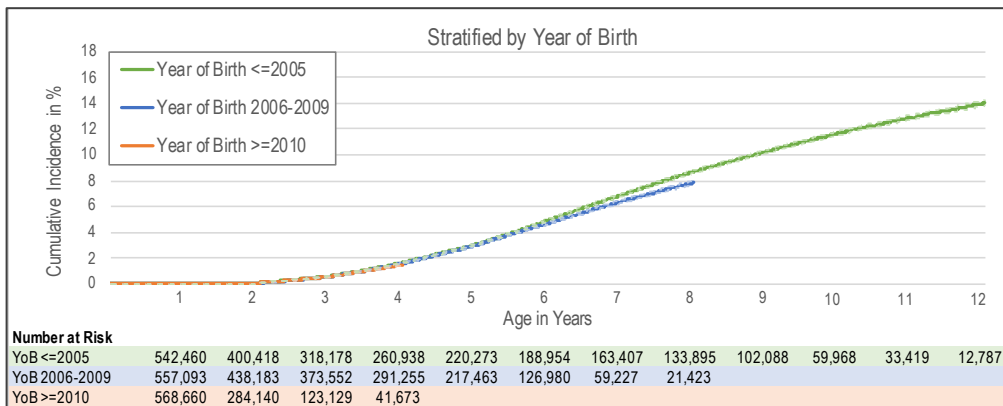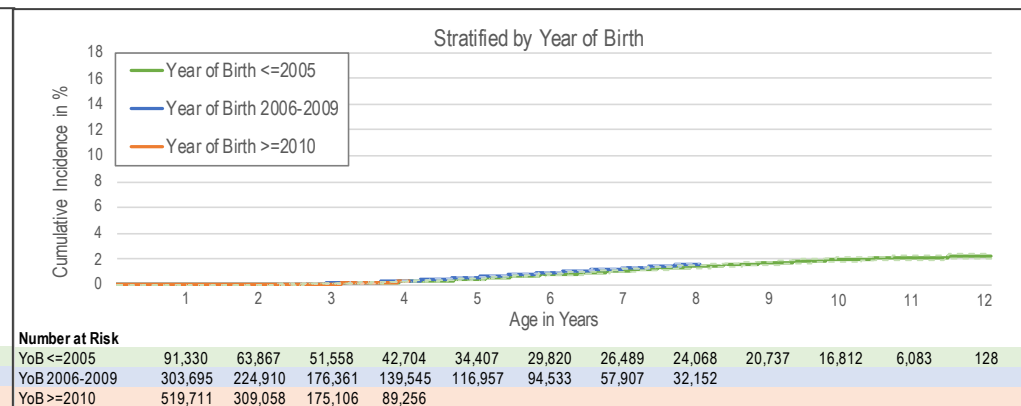

**Among Publicly Insured Children**

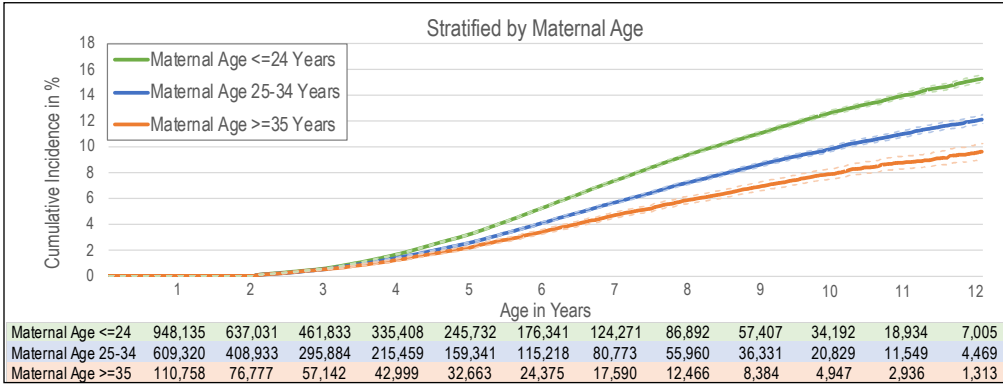

**Among Privately Insured Children**

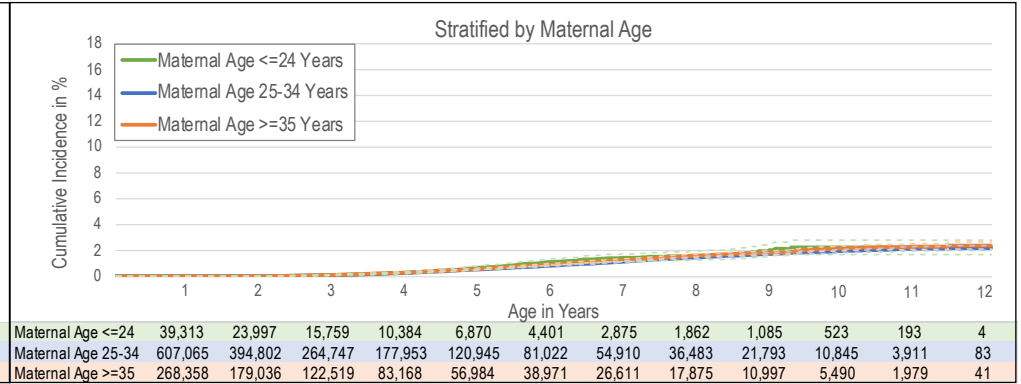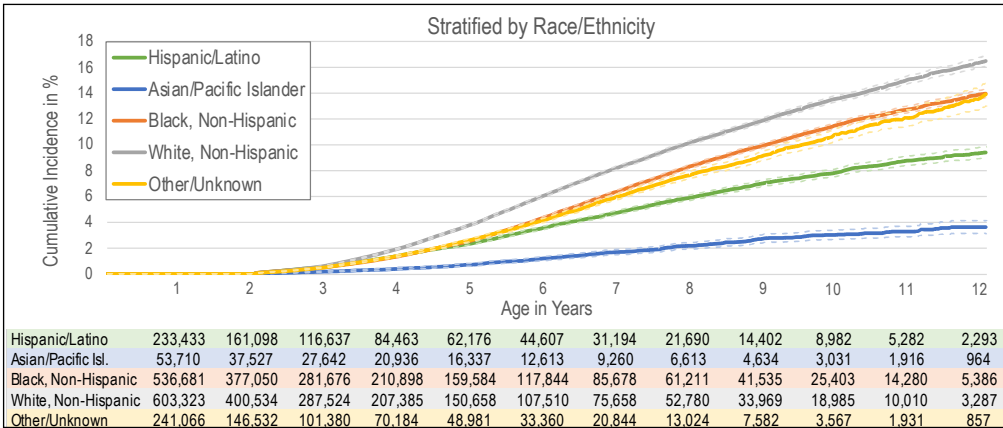

**eFigure 2.** Children’s Mean Age in Years (95% Confidence Interval) at Diagnosis of Each of the Specific Neurodevelopmental Disorders of Interest, Separately for Publicly and Privately Insured Children, Stratified by A) Child’s Sex, B) Maternal Age, and C) Race/Ethnicity (Public Insurance Only)

**A. Child's Sex**

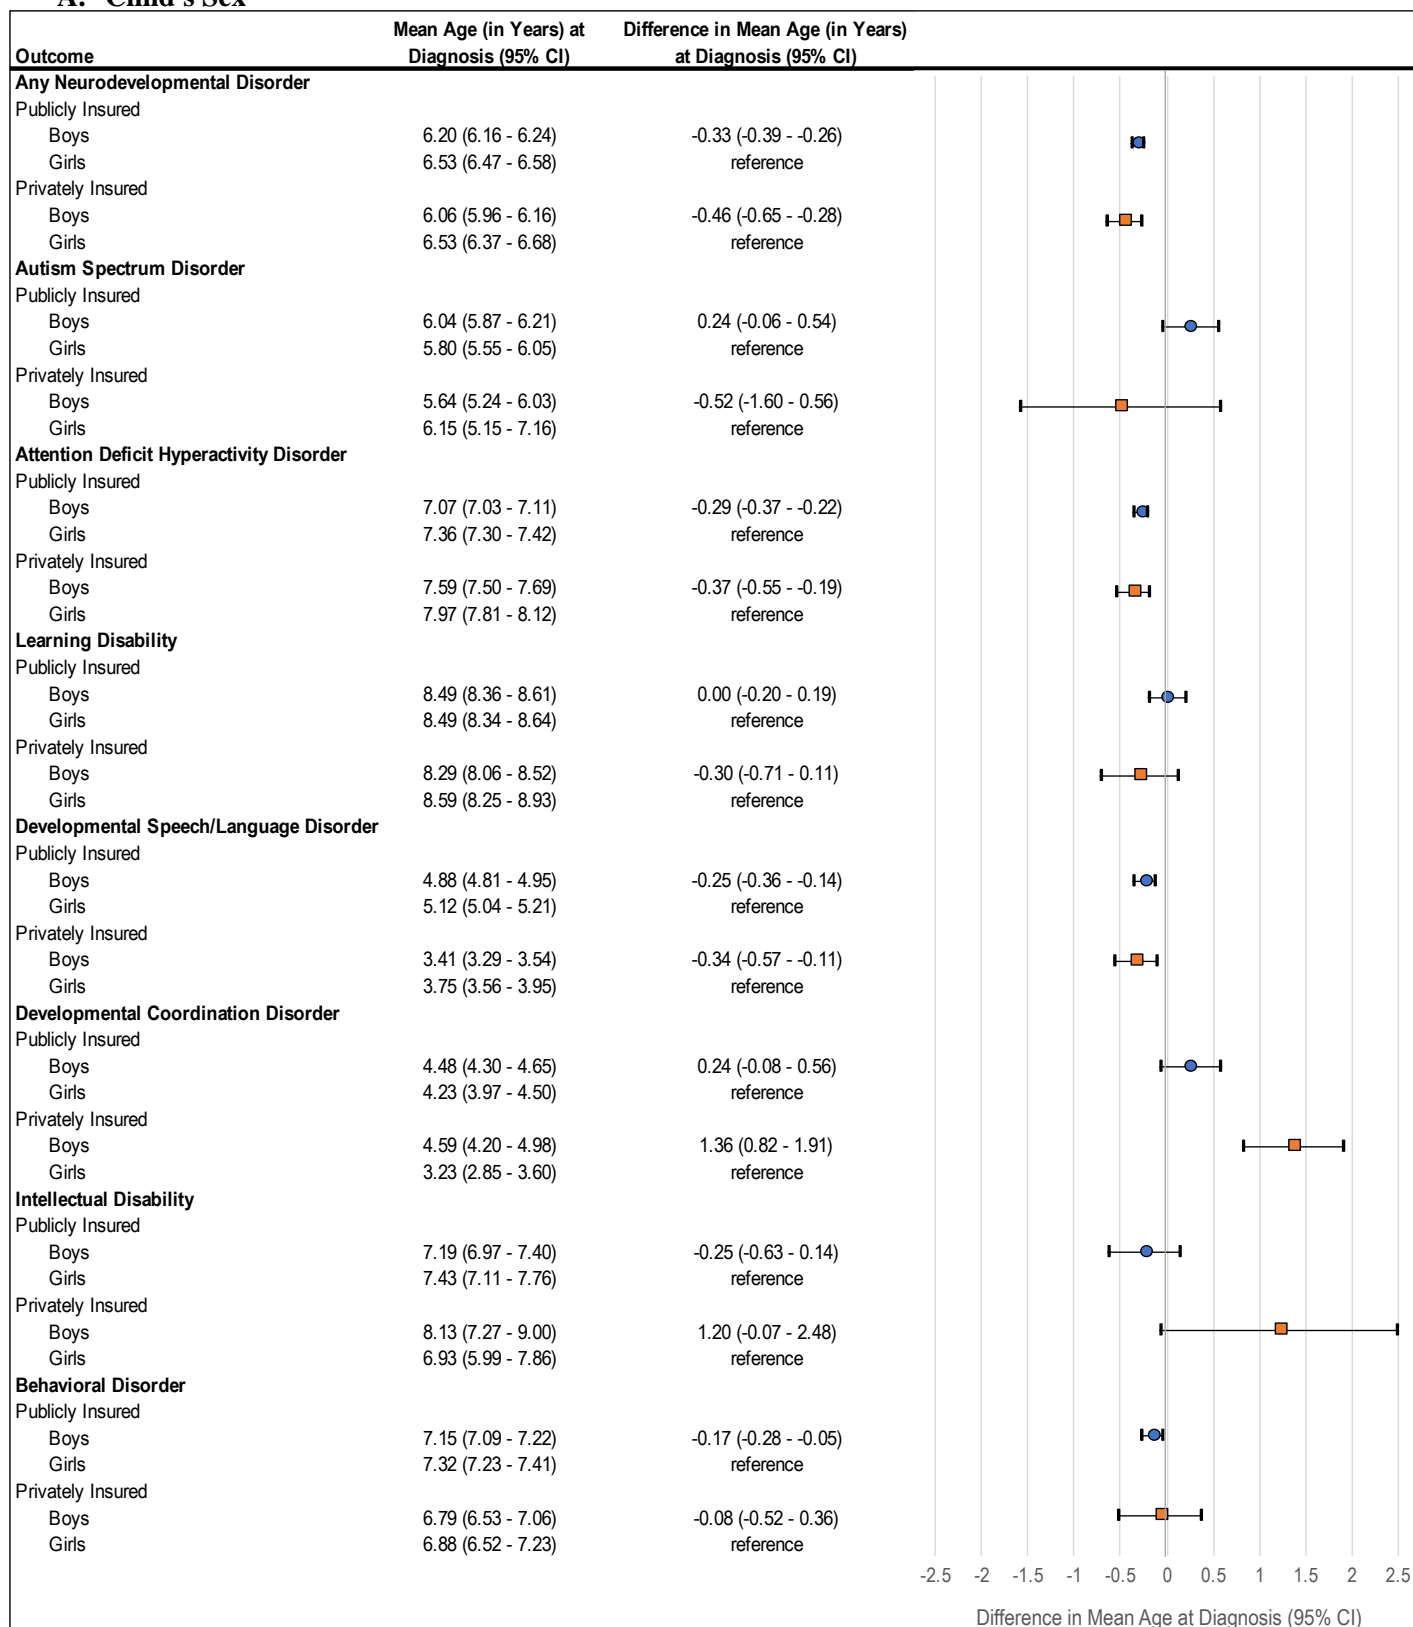

**eFigure 2. Children's Mean Age in Years (95% Confidence Interval) at Diagnosis of Each of the Specific Neurodevelopmental Disorders of Interest, Separately for Publicly and Privately Insured Children, Stratified by A) Child's Sex, B) Maternal Age, and C) Race/Ethnicity (Public Insurance Only) (Continued)**

**B. Maternal Age**

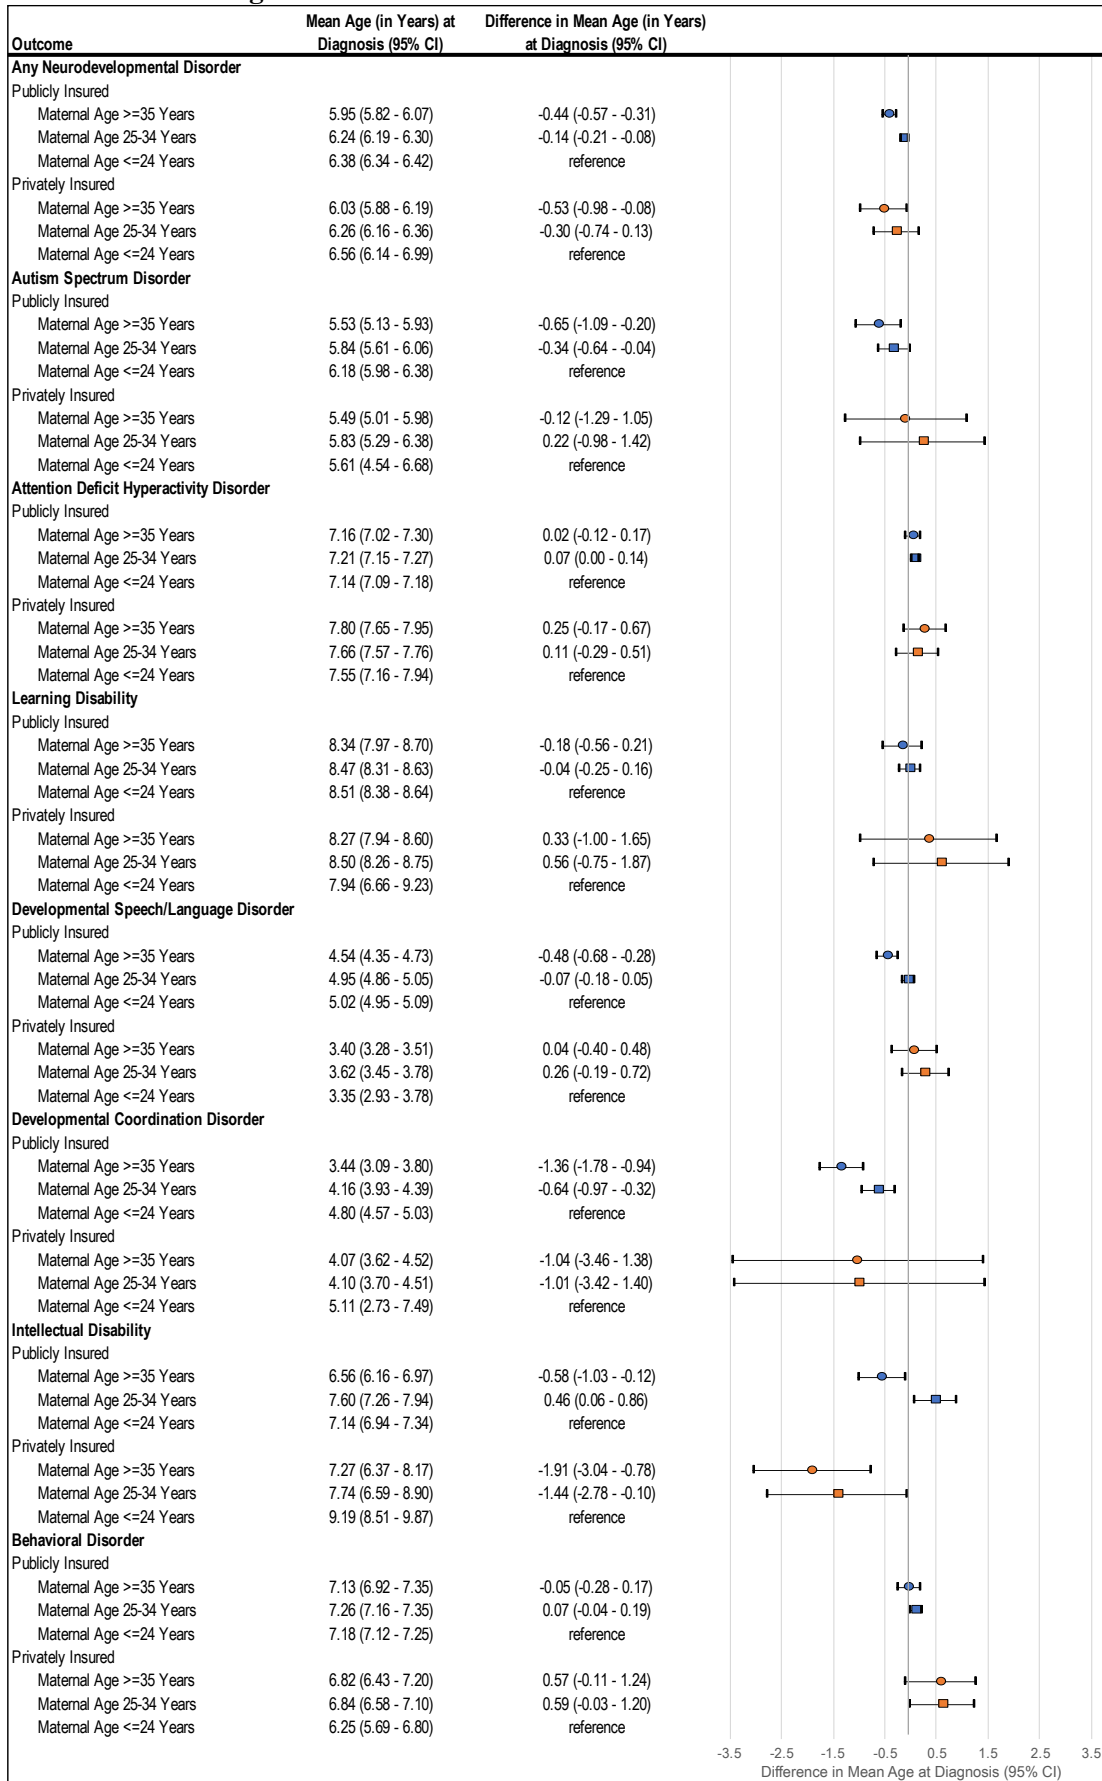

**eFigure 2. Children's Mean Age in Years (95% Confidence Interval) at Diagnosis of Each of the Specific Neurodevelopmental Disorders of Interest, Separately for Publicly and Privately Insured Children, Stratified by A) Child's Sex, B) Maternal Age, and C) Race/Ethnicity (Public Insurance Only) (Continued)**

**C. Race/Ethnicity**

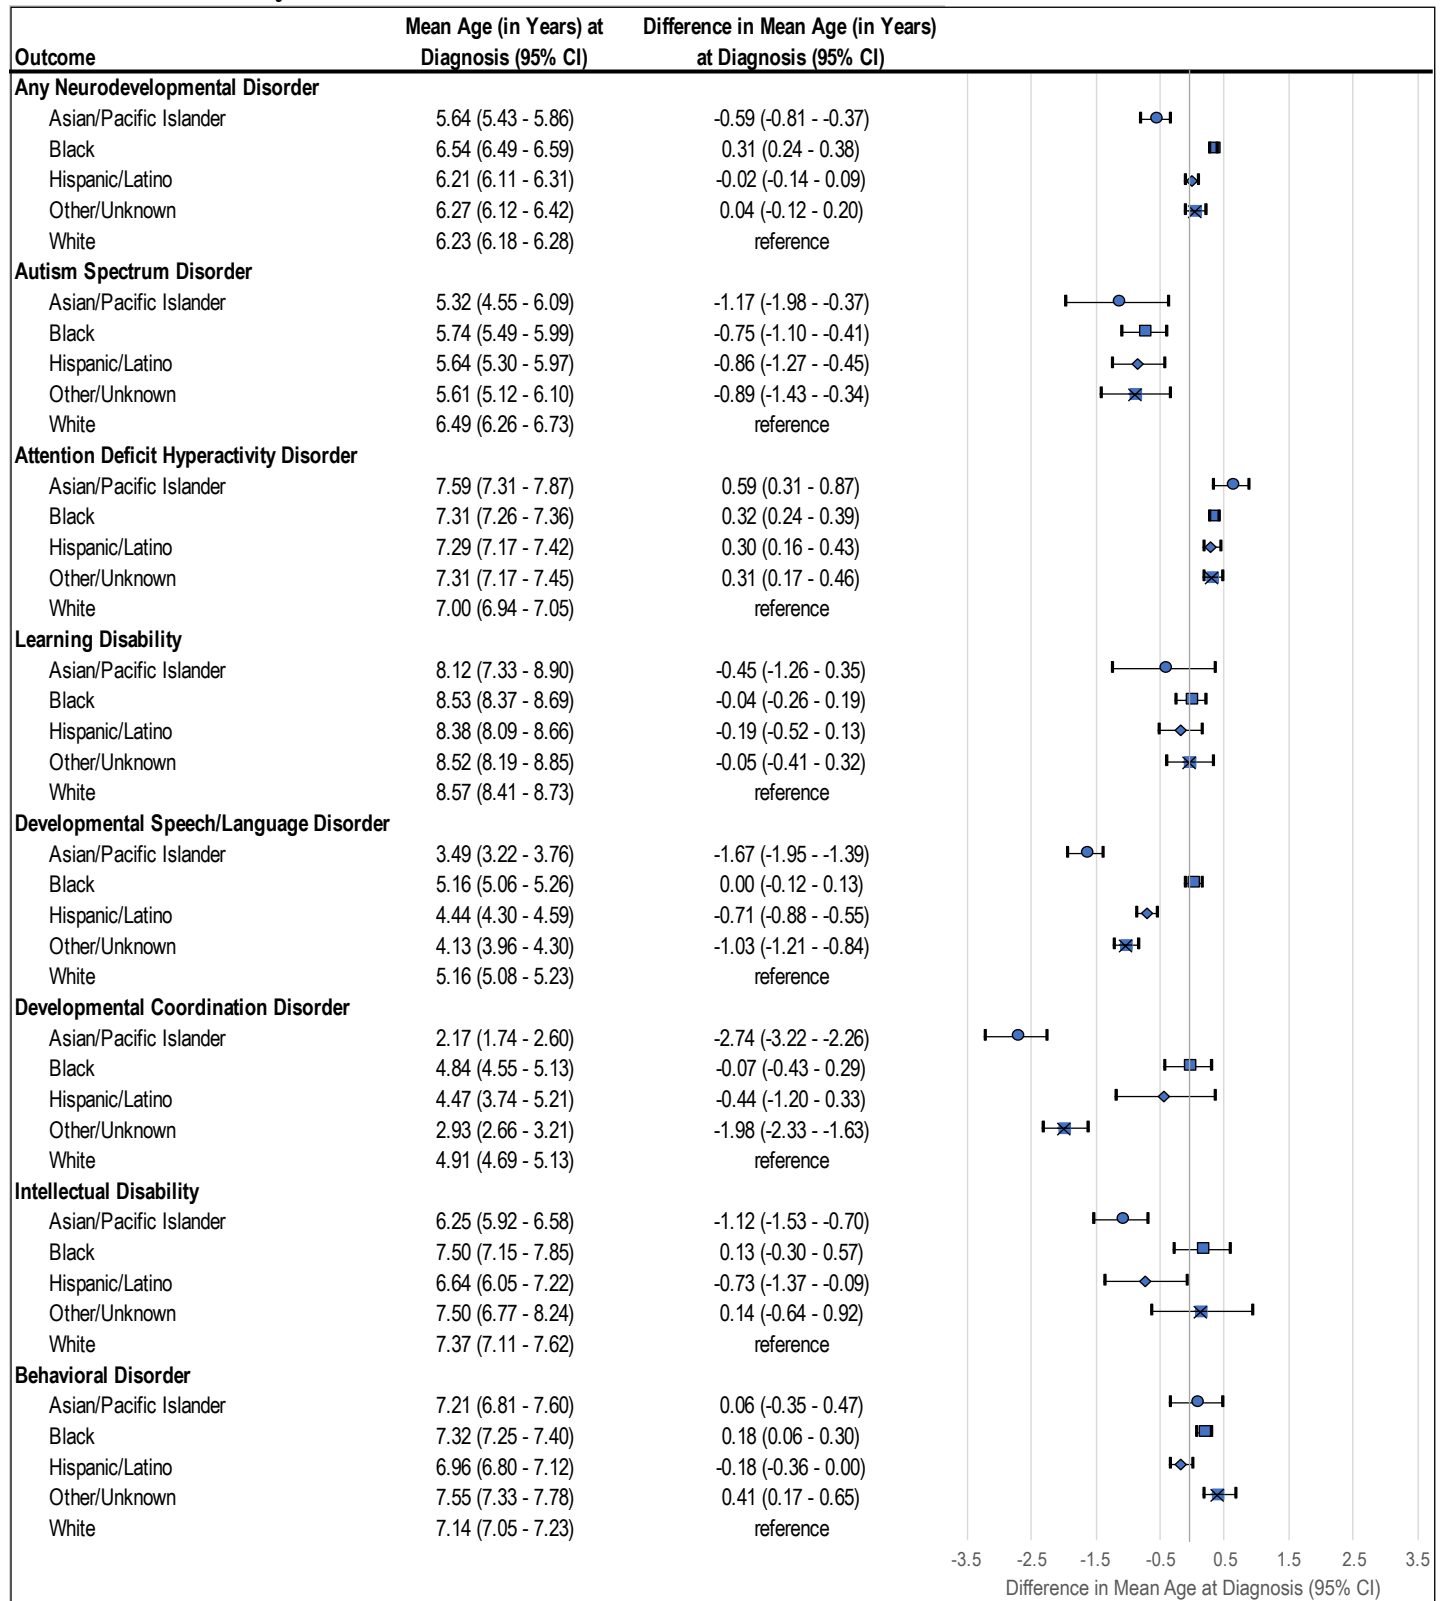

Abbreviation: CI, confidence interval.

\* Information on race/ethnicity only available in MAX.

**eFigure 3. Length of Continuous Enrollment Stratified by Birth Year, Among A) Publicly Insured and B) Privately Insured Children**

**A) Publicly Insured**

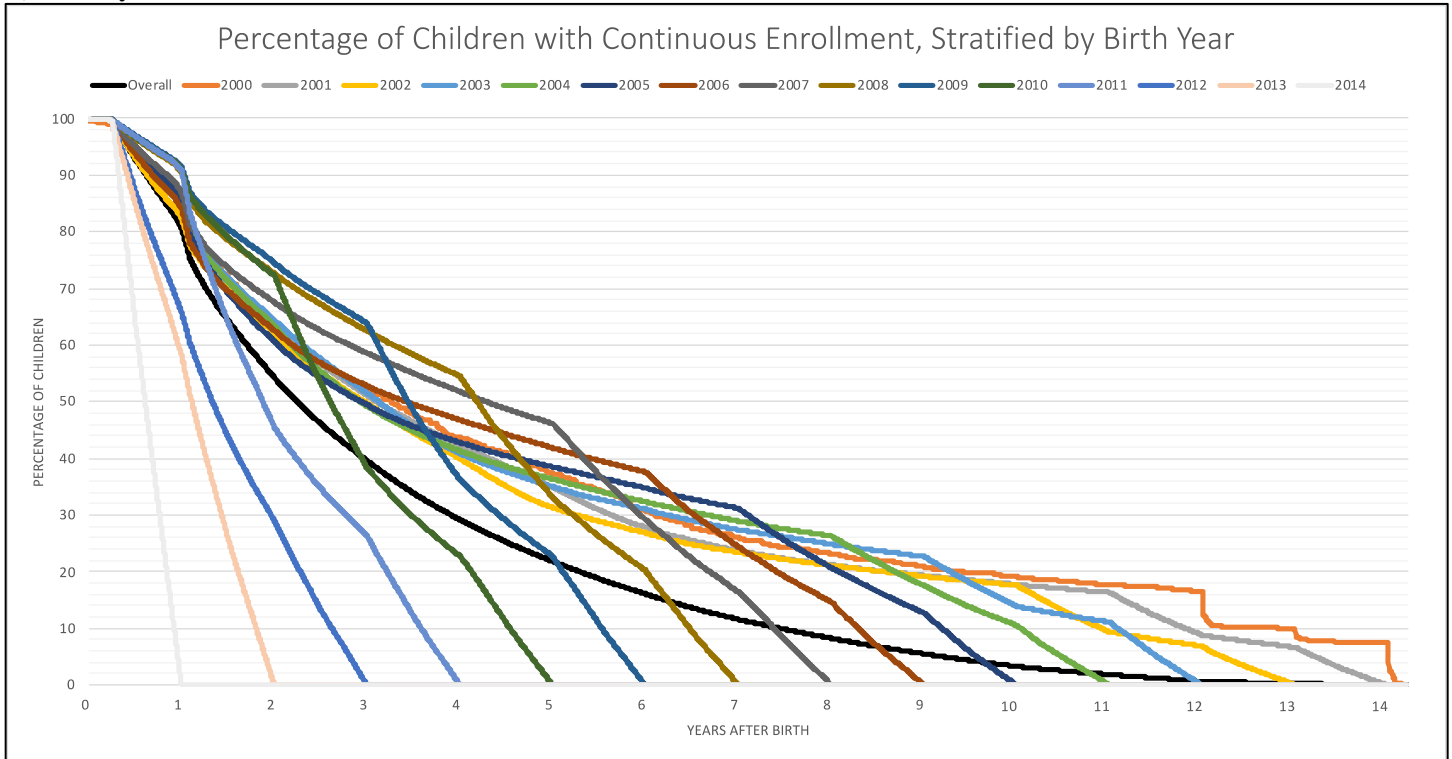

**B) Privately Insured Children**

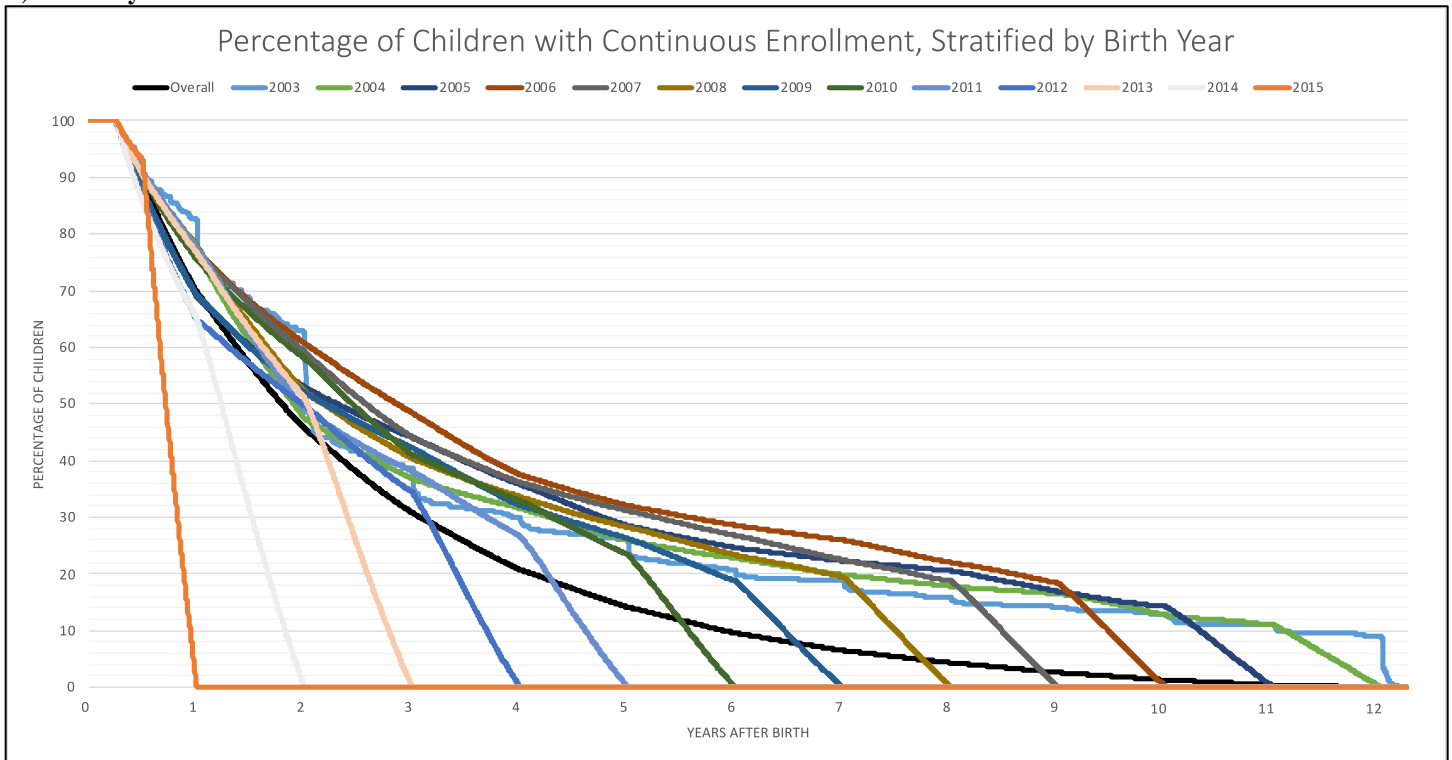



## eAppendix 1. Description and Patient Characteristics of the Publicly and Privately Insured Mother-Child Linked Cohorts

### Description of Cohorts:

For this project, we used information of pregnant women and their liveborn children nested in the Medicaid Analytic eXtract (MAX) 2000-2014 and the IBM Health MarketScan Research Database (MarketScan) 2003-2015. The MAX database consists of healthcare claims from the nationwide Medicaid population, thus, including an overrepresentation of teens and young adults, African-Americans, and disabled persons. The MarketScan database is the largest nationwide dataset that is based on commercial health insurance claims. It includes data from >100 commercial health insurers, which together provide coverage for over 25 million members annually with active policies throughout the US.

For both cohorts, we have previously developed a mother-child linkage algorithm that is based on state, insurance case number (to identify family units), and date of delivery.<sup>a</sup> As Medicaid currently covers about 50% of births in the US, and commercial insurers cover most of the balance, the MAX and MarketScan cohorts, taken together, are therefore expected to be highly representative of the overall US obstetric population.

<sup>a</sup>Palmsten K, Huybrechts KF, Mogun H, et al. Harnessing the Medicaid Analytic eXtract (MAX) to Evaluate Medications in Pregnancy: Design Considerations. PLoS One. 2013;8(6):e67405. doi:10.1371/journal.pone.0067405

### Patient Characteristics<sup>b</sup>:

| Name                               | Number of Pregnancies (%) |                          |
|------------------------------------|---------------------------|--------------------------|
|                                    | Public Insurance Cohort   | Private Insurance Cohort |
| Total                              | 2,070,541                 | 1,309,900                |
| <b>Demographic Characteristics</b> |                           |                          |
| Follow Up After Birth              |                           |                          |
| <=2 Years                          | 1,250,685 (60.40%)        | 906,441 (69.20%)         |
| >2 to <=5 Years                    | 486,961 (23.52%)          | 277,940 (21.22%)         |
| >5 Years                           | 332,895 (16.08%)          | 125,519 (9.58%)          |
| Maternal Age at Delivery           |                           |                          |
| <=24 Years                         | 1,166,585 (56.34%)        | 60,140 (4.59%)           |
| 25-34 Years                        | 766,130 (37.00%)          | 874,228 (66.74%)         |
| >=35 Years                         | 275,652 (13.31%)          | 751,064 (57.34%)         |
| Gender                             |                           |                          |
| Male                               | 1,045,426 (50.49%)        | 667,607 (50.97%)         |
| Female                             | 1,007,171 (48.64%)        | 629,448 (48.05%)         |
| Unknown                            | 17,944 (0.87%)            | 12,845 (0.98%)           |
| Region                             |                           |                          |
| Northeast                          | 356,984 (17.24%)          | 205,742 (15.71%)         |
| Midwest                            | 658,600 (31.81%)          | 337,794 (25.79%)         |
| South                              | 602,053 (29.08%)          | 517,925 (39.54%)         |
| West                               | 452,904 (21.87%)          | 233,239 (17.81%)         |
| Year of Birth                      |                           |                          |
| Before 2006                        | 639,259 (30.87%)          | 126,032 (9.62%)          |
| 2006-2009                          | 631,217 (30.49%)          | 407,475 (31.11%)         |
| After 2009                         | 800,065 (38.64%)          | 776,393 (59.27%)         |
| Race/Ethnicity <sup>c</sup>        |                           |                          |
| Asian/Pacific Islander             | 75,662 (3.65%)            | -                        |
| Black/African American             | 682,730 (32.97%)          | -                        |
| Hispanic/Latino                    | 295,585 (14.28%)          | -                        |
| Other/Unknown                      | 170,807 (8.25%)           | -                        |
| White                              | 845,757 (40.85%)          | -                        |
| <b>Maternal Conditions</b>         |                           |                          |
| Pre-existing Hypertension          | 50,774 (2.45%)            | 29,654 (2.26%)           |
| Pre-eclampsia                      | 110,853 (5.35%)           | 81,894 (6.25%)           |
| Pre-existing Diabetes              | 53,756 (2.60%)            | 30,621 (2.34%)           |
| Gestational Diabetes               | 3,015 (0.15%)             | 1,506 (0.11%)            |
| <b>Obstetric Conditions</b>        |                           |                          |

| Name                           | Number of Pregnancies (%) |                          |
|--------------------------------|---------------------------|--------------------------|
|                                | Public Insurance Cohort   | Private Insurance Cohort |
| Low Birth Weight               | 106,833 (5.16%)           | 48,806 (3.73%)           |
| Small for Gestational Age      | 72,270 (3.49%)            | 43,097 (3.29%)           |
| Neonatal Hypoxia/Asphyxia      | 18,599 (0.90%)            | 9,101 (0.69%)            |
| Preterm Birth (>28 and <37 GW) | 229,369 (11.08%)          | 116,099 (8.86%)          |
| Very Preterm Birth (<=28 GW)   | 18,241 (0.88%)            | 7,961 (0.61%)            |

<sup>b</sup>The following assessment periods were used for the respective covariates:

- First date of last menstrual period (LMP)-90 days to LMP+90 days: pre-existing hypertension
- LMP-90 days to LMP+140 days: pre-existing diabetes
- LMP+140 days to delivery: gestational diabetes
- LMP+140 days to delivery+30 days: pre-eclampsia
- delivery to delivery+30 days: preterm/very preterm birth, low birth weight, small for gestational age
- delivery hospitalization: neonatal hypoxia/asphyxia

<sup>c</sup>Information on race/ethnicity not available in the privately insured cohort (MarketScan).

**eAppendix 2.** Calculation of Mean Age at Diagnosis and 95% Confidence Intervals Accounting for Loss to Follow up

**Kaplan-Meier Survival Probability Until Period t:**

$$\hat{S}_0 = 1$$

$$\hat{S}_{t+1} = \hat{S}_t \cdot (1 - \hat{\lambda}_t)$$

where:

$N_t$ : number of people in sample at beginning of period  $t$

$D_t$ : number of deaths in period  $t$

Estimated death rate

$$\hat{\lambda}_t \equiv D_t / N_t$$

Variance estimation via Greenwood's formula<sup>a</sup>:

$$\widehat{Var}(S_t) = S_t^2 \sum_{s < t} \frac{D_s}{N_s (N_s - D_s)}$$

**Calculation of Mean Age at Dx:**

Survival function among those who developed the outcome by time T:

$$S_t \equiv 1 - \frac{1 - S_t}{1 - S_T} = \frac{S_t - S_T}{1 - S_T}$$

Mean age at Dx conditional on developing the outcome by time T:

$$\hat{\chi}_T \equiv \sum_{t=0}^T \frac{\hat{S}_t - \hat{S}_T}{1 - \hat{S}_T}$$

**Calculation of Variance Around Mean Age:**

Modified formula of Klein & Moeschberger (2003)<sup>b</sup> which allows the calculation of mean and variance conditional on developing the outcome by time T:

$$Var(\hat{\mu}_T) = \sum_{u=0}^T \left( \sum_{t=u+1}^T \hat{S}_t \right)^2 \frac{D_s}{N_s (N_s - D_s)}$$

$$Var(\hat{\chi}_T) = \sum_{s=0}^{T-1} \left[ \sum_{t=s+1}^T \frac{\hat{S}_t}{1 - \hat{S}_T} - \sum_{t=0}^T \frac{(1 - \hat{S}_t) \hat{S}_T}{(1 - \hat{S}_T)^2} \right]^2 \frac{D_s}{N_s (N_s - D_s)}$$

<sup>a</sup>Greenwood M, Jr. The Natural Duration of Cancer. Reports of Public Health and Related Subjects Vol 33, HMSO, London; 1926.

<sup>b</sup>Klein, J.P. and Moeschberger, M.L. (2003) Survival analysis: Techniques for censored and truncated data, equation (4.5.2). 2nd Edition, Springer, New York.
